# Supplementary material
Source: publisher figshare collection journal article supplement (https://gsapubs.figshare.com/ndownloader/files/22397937)
Supplement: Supplementary file 1 [file 22397937]

**References from Endnote library in Supplementary data file 1**

Aleinikoff, J. N., Dusel-Bacon, C., Foster, H. L. & Nokleberg, W. J. (1987). Pb-isotope fingerprinting of tectonostratigraphic terranes, east-central Alaska. *Canadian Journal of Earth Sciences* **24**, 2089-2098.

Aleinikoff, J. N., Plafker, G. & Nokleberg, W. J. (1988). Middle Pennsylvannian plutonic rocks along the southern margin of Wrangellia. *U. S. Geological Survey.* Circular 1016.

Anderson, R. G. (1988). Jurassic and Cretaceous-Tertiary plutonic rocks on the Queen Charlotte Islands, British Columbia. In: *Current Research, part E*. Geological Survey of Canada, Paper 88-1E. pp.

Anderson, R. G. (1991). Jurassic magmatism in NW Stikinia and north central Wrangellia, British Columbia. *Geological Society of America Abstracts with Programs* **23**(5), A190.

Anderson, R. G. & Greig, C. J. (1989). Jurassic and Tertiary plutonism in the Queen Charlotte Islands, British Columbia. *Current Research 89-1H, Geological Survey of Canada*, 95-104.

Anderson, R. G. & McNicoll, V. J. (1995). A note on U-Pb dating of Middle Jurassic plutonic suites: Cumshewa Head pluton, southeastern Moresby Island, Queen Charlotte Islands, British Columbia. *Current Research 95-A, Geological Survey of Canada*, 91-96.

Anderson, R. G. & Reichenbach, I. (1991). U-Pb and K-Ar framework for Middle to Late Jurassic (172-158 Ma) and Tertiary (46-27 Ma) plutons in Queen Charlotte Islands, British Columbia. In: Woodsworth, G. J. (ed.) *Evolution and Hydrocarbon Potential of the Queen Charlotte Basin, British Columbia*. Geological Survey of Canada, Paper 90-10. pp. 59-87.

Andrew, A. (1987). Lead and strontium isotope study of five volcanic and intrusive rock suites and related mineral deposits, Vancouver Island, British Columbia. Ph.D., The University of British Columbia.

Andrew, A., Armstrong, R. L. & Runkle, D. (1991). Neodymium-strontium-lead isotope study of Vancouver Island igneous rocks. *Canadian Journal of Earth Sciences* **28**, 1744-1752.

Andrew, A. & Godwin, C. I. (1989). Lead- and strontium-isotope geochemistry of Paleozoic Sicker Group and Jurassic Bonanza Group volcanic rocks and Island Intrusions, Vancouver Island, British Columbia. *Canadian Journal of Earth Sciences* **26**, 894-907.

Andrew, A. & Godwin, C. I. (1989). Lead- and strontium-isotope geochemistry of the Karmutsen Formation, Vancouver Island, British Columbia. *Canadian Journal of Earth Sciences* **26**, 908-919.

Andrew, A. & Godwin, C. I. (1989). Lead- and strontium-isotope geochemistry of the Tertiary Catface intrusions and related mineralization, Vancouver Island, British Columbia. *Canadian Journal of Earth Sciences* **26**, 920-926.

Archibald, D. A. & Nixon, G. T. (1995). 40Ar/39Ar geochronometry of igneous rocks in the Quatsino-Port McNeill map area, northern Vancouver Island (92L/12, 11). In: *Geological Fieldwork 1994*. BC Geological Survey Paper 1995-1, pp. 49-59.

Armstrong, A. K. & MacKevett, E. M., Jr. (1977). The Triassic Chitistone Limestone, Wrangell Mountains, Alaska. *U. S. Geological Survey.* Open-File Report 77-217, D49-D62 p.

Armstrong, A. K. & MacKevett, E. M., Jr. (1982). Geologic relations of Kenecotte-type copper deposits, Wrangell Mountains, Alaska. B. Carbonate sedimentation; Sabkha facies, diagenesis, and stratigraphy, lower part Chitistone Limestone- the ore host rock. *U. S. Geological Survey.* Professional Paper 1212-A, 26 p.

Armstrong, A. K. & MacKevett, E. M., Jr. (1982). Stratigraphy and diagenetic history of the lower part of the Triassic Chitistone Limestone, Alaska. *U. S. Geological Survey.* Professional Paper 1212-A, 26 p.

Armstrong, A. K., MacKevett, E. M., Jr. & Silberling, N. J. (1969). The Chitistone and Nizina limestones of part of the southern Wrangell Mountains-a preliminary report stressing carbonate petrography and depositional environments. *U. S. Geological Survey.* Professional Paper 650-D, D49-D62 p.

Armstrong, R. L. (1985). Rb-Sr dating of the Bokan Mountain Granite Complex and its country rocks. *Canadian Journal of Earth Sciences* **22**, 1233-1236.

Armstrong, R. L., Isachsen, C. & Scott, K. (unpublished manuscript). Rb-Sr and Sr isotopic study and U-Pb dating of Vancouver Group igneous rocks and related Island Intrusions and of the Coast Plutonic Complex and Early Cenozoic igneous rocks of Vancouver Island, British Columbia.

Armstrong, R. L. & Ward, P. L. (1993). Late Triassic to Earliest Eocene Magmatism in the North American Cordillera: Implications for the Western Interior Basin. In: Caldwell, W. G. E. & Kauffman, E. G. (eds.) *Evolution of the Western Interior Basin*. Geological Association of Canada, Special Paper 39. pp. 49-72.

Armstrong, R. L. A. (1988). Mesozoic and early Cenozoic magmatic evolution of the Canadian Cordillera. *Geological Society of America Special Paper, 218*, 55-91.

Asihene, K. A. B. (1970). The Texada Formation and its associated magnetite concentrations. Unpublished Ph.D. dissertation, University of California, Los Angeles, 188 pp.

Barker, F., Aleinikoff, J. N., Box, S. E., Evans, B. W., Gehrels, G. E., Hill, M. D., Irving, A. J., Kelley, J. S., Leeman, W. P., Lull, J. S., Nokleberg, W. J., Pallister, J. S., Patrick, B. E., Plafker, G. & Rubin, C. M. (1994). Some accreted volcanic rocks of Alaska and their elemental abundances. In: Plafker, G. & Berg, H. C. (eds.) *The Geology of North America*. Geological Society of America: Boulder, CO. The Geology of Alaska G-1, pp. 555-588.

Barker, F. & Arth, J. G. (1984). Preliminary results, central gneiss complex of the coast range batholith, southeastern Alaska: the roots of a high-K, calc-alkaline arc? *Physics of the Earth and Planetary Interiors* **35**, 191-198.

Barker, F., Brown, A. S., Budahn, J. R. & Plafker, G. (1989). Back-arc with frontal-arc component origin of Triassic Karmutsen basalt, British Columbia, Canada. *Chemical Geology* **75**, 81-102.

Bean, K. W., Bittenbender, P. E., Gensler, E. C. & Borhauer, J. L. (2004). Mineral investigations in the Delta River Mining District, east-central Alaska, 2003. *U.S. Bureau of Land Management.* Open File Report 95, 54 p.

Beard, J. S. & Barker, F. (1989). Petrology and tectonic significance of gabbros, tonalites, shoshonites, and anorthosites in a Late Paleozoic arc-root complex in the Wrangellia Terrane, southern Alaska. *Journal of Geology* **97**, 667-683.

Beck, M. E., Jr (1989). Paleomagnetism of the continental North America: Implication for displacement of crustal blocks within the Western Cordillera, Baja California to British Columbia. In: Pakiser, L. C. & Mooney, W. D. (eds.) *Geophysical Framework of the Continental United States*. Geological Society of America Memoir. 172, pp.

Belasky, P. & Runnegar, B. (1994). Permian longitudes of Wrangellia, Stikinia, and Eastern Klamath terranes based on coral biogeography. *Geology* **22**, 1095-1098.

Bell, C. C. (1999). Origin of sulphides associated with the Spy Sill, Klu Property, Kluane Belt, Southwest Yukon. M.Sc., University of British Columbia, 160 pp.

Berg, H. C., Elliott, R. L. & Koch, R. D. (1988). Geologic map of the Ketchikan and Prince Rupert quadrangles, southeastern Alaska. *U.S. Geological Survey Map I-1807, 27 p., 1 sheet, scale 1:250,000* Geologic map of the Ketchikan and Prince Rupert quadrangles, southeastern Alaska.

Berg, H. C., Jones, D. L. & Richer, D. H. (1972). Gravina-Nutzotin Belt-tectonic significance of an upper Mesozoic sedimentary and volcanic sequence in southern and southeastern Alaska. *U.S. Geological Survey.* Professional Paper 800-D, D1-D24 p.

Bevier, M. L. (1989). A lead and strontium isotopic study of the Anahim volcanic belt, British Columbia: Additional evidence for widespread suboceanic mantle beneath western North America. *Geological Society of America Bulletin* **101**, 973-981.

Bittenbender, P. E., Bean, K. W. & Borhauer, J. L. (2004). Digital Data Release, Mineral investigations in the Delta River Mining District, east-central Alaska, 2001-2004. *U.S. Bureau of Land Management.* Digital Data Release.

Bittenbender, P. E., Bean, K. W. & Gensler, E. G. (2003). Mineral Investigations in the Delta River Mining District, East-Central Alaska 2001-2002. *U. S. Bureau of Land Management-Alaska.* Open-File Report 91, 88 p.

Bittenbender, P. E., Bean, K. W., Kurtak, J. M. & Deninger, J., Jr (2007). Mineral assessment of the Delta River Mining District area, East-central Alaska. *U. S. Bureau of Land Management-Alaska.* Technical Report 57, 676 p. http://www.blm.gov/pgdata/etc/medialib/blm/ak/aktest/tr.Par.86412.File.dat/BLM_TR57.pdf.

Blodgett, R. B. (2002). Paleontological Inventory of the Amphitheater Mountains, Mt. Hayes A-4 and A-5 Quadrangles, southcentral Alaska. *Alaska Division of Geological and Geophysical Surveys.* Report of Investigations 2002-3, 11 p.

Bond, G. C. (1973). A late Paleozoic volcanic arc in the eastern Alaska Range, Alaska. *Journal of Geology* **81**, 557-575.

Bond, G. C. (1976). Geology of the Rainbow Mountian-Gulkana Glacier area, eastern Alaska Range, with emphasis on upper Paleozoic strata. *Alaska Division of Geological and Geophysical Surveys.* Geologic Report 45, 47 p.

Bostock, H. S. (1952). Geology of the northwest Shakwak Valley, Yukon Territory. *Geological Survey of Canada.* Memoir 267.

Brandon, M. T. (1985). Mesozoic melange of the Pacific Rim complex, western Vancouver Island. In: Tempelman-Kluit, D. (ed.) *Field Guides to Geology and Mineral Deposts in the Southern Canadian Cordillera*. Geological Society of America, Cordilleran section annual meeting, Field Trip Guidebook 7. pp. 7.1-7.28.

Brandon, M. T., Cowan, D. S., Muller, J. E. & Vance, J. A. (1983). Pre-Tertiary geology of San Juan Islands, Washington and southeast Vancouver Island, British Columbia. In: *Geological Association of Canada - Mineralogical Association of Canada Annual Meeting, Field Trip Guidebook, Trip 5*. Univeristy of Victoria, Victoria, B. C., pp. 65.

Brandon, M. T., Orchard, M. J., Parrish, R. R., Sutherland-Brown, A. & Yorath, C. J. (1986). Fossil ages and isotopic dates from the Paleozoic Sicker Group and associated intrusive rocks, Vancouver Island, British Columbia. *Geological Survey of Canada Paper 86-1A.* Current Research, Part A, 683-696 p.

Breitsprecher, K. & Mortensen, J. K. (2004). BCAge 2004A-1 - a database of isotopic age determinations for rock units from British Columbia. *British Columbia Ministry of Energy and Mines, Geological Survey.* Open File 2004-3 (Release 3.0) 7757 records, 9.3 Mb.

Breitsprecher, K. & Mortensen, J. K. (2004). YukonAge 2004: A database of isotopic age determinations for rock units from Yukon Territory. *Yukon Geological Survey.* CD-ROM.

Brew, D. A. & Ford, A. B. (1984). The northern Coast plutonic complex, southeastern Alaska and northwestern British Columbia. *U. S. Geological Survey.* Circular 868, 120-124 p.

Brew, D. A., Karl, S. M. & Tobey, E. F. (eds.) (1985). *Re-interpretation of the Kuiu-Etolin belt volcanic rocks, Kupreanof Island, southeastern Alaska*. The U. S. Geological Survey in Alaska: Accomplishments during 1983 U.S. Geological Survey Circular 945. 86-88 pp.

Burns, L. E. (2003). Color shadow magnetic map of the southern Delta River area, east-central Alaska. *Alaska Division of Geological and Geophysical Surveys.* Geophysical Report 2003-5-1C, 2 sheets, scale 1:63,360.

Burns, L. E. & Clautice, K. H. (2003). Portfolio of aeromagnetic and resistivity maps of the southern Delta River area, east-central Alaska. *Alaska Division of Geological and Geophysical Surveys.* Geophysical Report 2003-8, 16 p.

Butler, R., Gehrels, G. & Bazard, D. (1997). Paleomagnetism of Paleozoic strata of the Alexander terrane, southeastern Alaska. *Geological Society of America Bulletin* **109**.

Butler, R. F., Dickinson, W. R. & Gehrels, G. E. (1991). Paleomagnetism of coastal California and Baja California: Alternatives to large-scale northward transport. *Tectonics* **10**(3), 561-576.

Cairnes, D. D. (1915). Exploration in southwest Yukon. *Geological Survey of Canada.* Summary Report 1913, 10-37 p.

Cameron, B. E. B. & Hamilton, T. S. (1988). Contributions to the stratigraphy and tectonics of the Queen Charlotte Basin, British Columbia. *Geological Survey of Canada.* Paper 88-1E, 221-227 p.

Campbell, R. B. & Dodds, C. J. (1982). Geology of the s.w. Kluane Lake map area (115F and 115 G), Yukon Territory. *Canadian Geological Survey* Open-File Report. 1:250,000.

Campbell, R. B. & Dodds, C. J. (1985). Geology of the Mount St. Elias map area (115B and 115C[E1/2]). *Canadian Geological Survey* Open-File Report. 1:250,000.

Campbell, S. W. (1976). Nickel-Copper-Sulphide Deposits in Kluane Ranges, Yukon (Parts of 115F, 115G). *Yukon Geological Survey.* Nickel-Copper-Sulphide Deposits in Kluane Ranges, Yukon (Parts of 115F, 115G) EGSD Open File 1976-10, 23 p.

Campbell, S. W. (1981). Geology and genesis of copper deposits and associated host rocks in and near the Quill Creek area, southwestern Yukon. Unpublished Ph.D. dissertation, University of British Columbia, 215 pp.

Carlisle, D. (1963). Pillow breccias and their aquagene tuffs, Quadra Island, British Columbia. *Journal of Geology* **71**, 48-71.

Carlisle, D. (1972). Late Paleozoic to Mid-Triassic sedimentary-volcanic sequence on Northeastern Vancouver Island. *Geological Society of Canada* Report of Activities 72-1, Part B, 24-30 p.

Carlisle, D. & Suzuki, T. (1974). Emergent basalt and submergent carbonate-clastic sequences including the Upper Triassic Dilleri and Welleri zones on Vancouver Island. *Canadian Journal of Earth Sciences* **11**, 254-279.

Carne, R. C. (1987). Report on 1987 exploration for copper-nickel-platinum group elements, Wellgreen property, Southwestern Yukon Territory, for Hudson-Yukon Mining Company, Ltd., Chevron Minerals, Ltd. and All-North Resources, Ltd. *Archer, Cathro and Associates (1981) Limited.* Report on 1987 exploration for copper-nickel-platinum group elements, Wellgreen property, Southwestern Yukon Territory, for Hudson-Yukon Mining Company, Ltd., Chevron Minerals, Ltd. and All-North Resources, Ltd., 1-51 p.

Carne, R. C. (1989). Report on proposed 1989 exploration; Canalask property latitude 61degrees 57minutes; longitude 140degrees 52 minutes, NTS 115F/15 for Kluane Joint Venture. *Archer, Cathro and Associates (1981) Limited.* Report on proposed 1989 exploration; Canalask property latitude 61degrees 57minutes; longitude 140degrees 52 minutes, NTS 115F/15 for Kluane Joint Venture, 1-12 p.

Carne, R. C. (2003). Metallogeny of the Kluane Ranges, southwest Yukon Territory. http://www.geology.gov.yk.ca/metallogeny/kluane/index.html.

Carson, D. J. T. (1973). The plutonic rocks of Vancouver Island, British Columbia: their petrography, chemistry, age and emplacement. *Geological Survey of Canada, Paper 72-44*, 1-70.

Chapin, T. (1918). The Nelchina-Susitna region, Alaska. *U.S. Geological Survey.* Bulletin 668, 67 p.

Cho, M. & Liou, J. G. (1987). Prehnite-pumpellyite to greenschist facies transition in the Karmutsen Metabasites, Vancouver Island, B. C. *Journal of Petrology* **28**(3), 417-443.

Cho, M., Liou, J. G. & Maruyama, S. (1987). Transition from the zeolite to prehnite-pumpellyite facies in the Karmutsen metabasites, Vancouver Island, British Columbia. *Journal of Petrology* **27**(2), 467-494.

Christopher, A., White, W. H. & Harakal, J. E. (1972). K-Ar dating of the Cork (Burwash Creek) Cu-Mo prospect, Burwash Landing Area, Yukon Territory. *Canadian Journal of Earth Sciences* **9**, 918-921.

Churkin, M. J., Foster, H. L., Chapman, R. M. & Weber, F. R. (1982). Terranes and suture zones in east central Alaska. *Journal of Geophysical Research* **87**, 3718-3730.

Clapp, C. H. (1909). Southeastern portion of Vancouver Island. *Geological Survey of Canada.* Summary Report 1908, 52-60 p.

Clapp, C. H. (1913). Southern Vancouver Island. *Geological Survey of Canada.* Memoir 13, 208 p.

Clapp, C. H. & Cooke, H. C. (1917). Sooke and Duncan map-areas, Vancouver Island. *Geological Survey of Canada.* Memoir 96, 445 p.

Clark, A. L., Clark, S. H. B. & Hawley, C. C. (1972). Significance of upper Paleozoic oceanic crust in the Upper Chulitna district, west-central Alaska Range. *U. S. Geological Survey.* Professional Paper 800-C, C95-C101 p.

Clowes, R. M., Zelt, C. A., Amor, J. R. & Ellis, R. M. (1995). Lithospheric structure in the southern Canadian Cordillera from a network of seismic refraction lines. *Canadian Journal of Earth Sciences* **32**(10), 1485-1513.

Cohen, H. A., Hall, C. M. & Lundberg, N. (1995). 40Ar/39Ar dating of detrital grains constrains the provenance and stratigraphy of the Gravina belt, southeastern Alaska. *Journal of Geology* **103**, 327-337.

Cole, R. B., Nelson, S. W., Layer, P. W. & Oswald, P. J. (2006). Eocene volcanism above a depleted mantle slab window in southern Alaska. *Geological Society of America Bulletin* **118**(1), 140-158.

Coney, P. J., Jones, D. L. & Monger, J. W. H. (1980). Cordilleran suspect terranes. *Nature* **288**(5789), 329.

Cowan, D. S. (1994). Alternative for the mid-Cretaceous paleogeography of the western Cordillera. *GSA Today* **4**, 181-186.

Csejtey, B., Jr., Cox, D. P., Evarts, R. C., Stricker, G. D. & Foster, H. L. (1982). The Cenozoic Denail fault system and the Cretaceous accretionary development of southern Alaska. *Journal of Geophysical Research* **87**, 3741-3754.

Csejtey, B., Jr., Mullen, M. W., Cox, D. P., Gilbert, W. G., Yeend, W. E., Smith, T. E., Wahrhaftig, C., Craddock, C., Brewer, W. M., Sherwood, K. W., Hickman, R. G., Stricker, G. D., St. Aubin, D. R. & Goerz, D. J., III (1986). Geology and geochronology of the Healy Quadrangle, Alaska. *U. S. Geological Survey Open-File Report 86-396, 4 sheets, scale 1:250,000.* Geology and geochronology of the Healy Quadrangle, Alaska, 92 p.

Csejtey, B., Jr., Nelson, W. H., Jones, D. L., Silberling, N. J., Dean, R. M., Morris, M. S., Lanphere, M. A., Smith, J. G. & Silberman, M. L. (1978). Reconnaissance geologic map and geochronology, Talkeetna Mountains Quadrangle, northern part of Anchorage Quadrangle, and southwest corner of Healy Quadrangle, Alaska. *U. S. Geological Survey* Open-File Report 78-558-A, 60 p., 1 sheet, scale 1:250,000.

Csejtey, B. J., Mullen, M. W., Cox, D. P. & Stricker, G. D. (1992). Geology and geochronology of the Healy Quadrangle, south-central Alaska. *U. S. Geological Survey* Miscellaneous Investigations 1961, scale 1:360,000, 63 p.

Currie, L. & Parrish, R. R. (1993). Jurassic accretion of Nisling terrane along the western margin of Stikinia, Coast Mountains, northwestern British Columbia. *Geology* **21**, 235-238.

Currie, L. D. & Parrish, R. R. (1997). Paleozoic and Mesozoic rocks of Stikinia exposed in northwestern British Columbia: Implications for correlations in the northern Cordillera. *Geological Society of America Bulletin* **109**(11), 1402-1420.

Davaei-Markazi, H. (1985). Petrology of Nikolai Greenstone (Basalt) and associated copper mineralization at Radovan Prospect, McCarthy Quadrangle, Alaska, U.S.A. MS, Northeastern Illinois University, 87 pp.

Davis, A. & Plafker, G. (1985). Comparative geochemistry and petrology of the Triassic basaltic rocks from the Taku terrane on the Chilkat Peninsula and Wrangellia. *Canadian Journal of Earth Sciences* **22**, 183-194.

Davis, A. S. & Plafker, G. (1986). Eocene basalts from the Yakutat terrane: Evidence for the origin of an accreting terrane in southern Alaska. *Geology* **14**, 963-966.

Davis, D. C. & Main, C. A. (1988). Geological, geophysical, geochemical and trenching report at the Mansfield and Chilkat properties, Tatshenshini River area, B. C. *Archer, Cathro and Associates (1981) Limited.* Geological, geophysical, geochemical and trenching report at the Mansfield and Chilkat properties, Tatshenshini River area, B. C., 1-36 p.

Davis, G. A., Monger, J. W. H. & Burchfiel, B. C. (1978). Mesozoic construction of the Cordilleran "Collage", central British Columbia to central California. In: Howell, D. G. & McDougall, K. A. (eds.) *Mesozoic Paleogeography of the Western United States*. Pacific section, Society of Economic Paleontologists and Mineralogists, Pacific Coast Peleogeography Symposium 2. pp. 1-32.

Dawson, G. M. (1880). Queen Charlotte Islands. *Geological Survey of Canada.* Report on Progress1878-1879.

Dawson, G. M. (1887). Report on a geological examination of the northern part of Vancouver Island and adjacent coasts. *Geological Survey of Canada.* Annual Report, New Series, Vol.2, 1B-107B p.

de Saint-Andre, B., Lancelot, J. & Collot, B. (1983). U-Pb geochronology of the Bokan Mountain peralkaline granite, southeastern Alaska. *Canadian Journal of Earth Sciences* **20**, 236-245.

DeBari, S. M., Anderson, R. G. & Mortensen, J. K. (1999). Correlation Among Lower to Upper Crustal Components in an Island Arc: the Jurassic Bonanza arc, Vancouver Island, Canada. *Canadian Journal of Earth Sciences* **36**, 1371-1413.

DeBari, S. M. & Mortensen, J. (1994). The Jurassic Bonanza arc, Vancouver Island, Canada: A window into the deep crust of an island arc. *Geological Society of America Abstracts with Programs* **26**(7), 332.

Debiche, M. G., Cox, A. & Engebretson, D. C. (1987). The motion of allochthonous across the North Pacific basin. *Geological Society of America.* Special Paper 207, 49 p.

Decker, J. (1980). Geology of a Cretaceous subduction complex, western Chichagof Island, southeastern Alaska. Ph. D., Stanford University, 135 pp.

Decker, J. E. (1981). Geochemical signature of the Goon Dip Greenstone on Chichagof Island, southeastern Alaska. *Alaska Division of Geological & Geophysical Surveys.* Geologic Report 73G, 29-35 p.

Detterman, R. (1988). Mesozoic biogeography of southern Alaska with implications for the paleogeography. *U. S. Geological Survey.* Open-File Report 88-662, 27 p.

Detterman, R. L. & Reed, B. L. (1980). Stratigraphy, structure, and economic geology of the Iliamna quadrangle, Alaska. *U. S. Geological Survey.* Bulletin 1368-B, 86 p.

Dodds, C. J. & Campbell, R. B. (1988). Potassium-argon ages of mainly intrusive rocks in the Saint Elias Mountains, Yukon and British Columbia. *Geological Society of Canada.* Paper 87-16, 43 p.

Dodds, C. J. & Campbell, R. B. (1992). Geology, Mount St. Elias map area [115B & C[E1/2]], Yukon Territory. *Geological Society of Canada.* Open File Report 2189, 85 p.

Dodds, C. J. & Campbell, R. B. (1992). Geology, NE Yakutat map area [114O], British Columbia. *Geological Society of Canada.* Open File Report 2191, 85 p.

Dodds, C. J. & Campbell, R. B. (1992). Geology, SW Dezadeash map area [115A], Yukon Territory. *Geological Society of Canada.* Open File Report 2190, 85 p.

Dodds, C. J. & Campbell, R. B. (1992). Geology, SW Kluane Lake map area [115G & F [E1/2]], Yukon Territory. *Geological Society of Canada.* Open File Report 2188, 85 p.

Dodds, C. J., Campbell, R. B., Read, P. B., Orchard, M. J., Tozer, E. T., Bamber, E. W., Pedder, A. E. H., Norford, B. S., McLaren, D. J., Harker, P., McIver, E., Norris, A. W., Ross, C. A., Chatterton, B. D. E., Cooper, G. A., Flower, R. H., Haggart, J. W., Uyeno, T. T. & Irwin, S. E. B. (1993). Macrofossil and conodont data from: SW Kluane Lake (115G and F [East half]), Mount St. Elias (115B and C [East half]), SW Dezedeash (115A), NE Yakutat (114O) and Tatshenshini River (114P) map areas, southwestern Yukon and northwestern British Columbia. *Geological Survey of Canada.* Open File 2731, 137 p.

Dolmage, V. (1919). Quatsino Sound and certain mineral deposits of the west coast of Vancouver Island, British Columbia. *Geological Survey of Canada.* Summary Report 1918, 30-38 p.

Dostal, J., Church, B. N. & Hoy, T. (2001). Geological and geochemical evidence for variable magmatism and tectonics in the southern Canadian Cordillera: Paleozoic to Jurassic suites, Greenwood, southern British Columbia. *Canadian Journal of Earth Sciences* **38**, 75-90.

Dostal, J., Gale, V. & Church, B. N. (1999). Upper Triassic Takla Group volcanic rocks, Stikine Terrane, north-central British Columbia: geochemistry, petrogenesis, and tectonic implications. *Canadian Journal of Earth Sciences* **36**, 1483-1494.

Douglass, S. L., Webster, J. H., Burrell, P. D., Lanphere, M. L. & Brew, D. A. (1989). Major element chemistry, radiometric ages, and locations of samples from the Petersburg and parts of the Port Alexander and Sumdum quadrangles, southeastern Alaska. *U.S. Geological Survey* Open-File Report 89-527, 66 p.

Dover, J. H. (1990). Geology of east-central Alaska. *U. S. Geological Survey.* Open-File Report 90-289.

Drinkwater, J. L., Brew, D. A. & Ford, A. B. (1990). Petrographic and chemical data for the large mesozoic and cenozoic plutonic sills east of Juneau, southeastern Alaska *U.S. Geological Survey.* Open-File Report 1918, 47 p.

Eaton, W. D. (1987). Report on prospecting and geochemical program Duke 1-16 claims (YB06331-YBo6346), Duke 17-24 claims (YB06904-YB06911), Duke 25-28 claims (YB06347-YB06350), Duke 29-44 claims (YB06912-YB06927); for Rockridge Mining Corporation. *Archer, Cathro and Associates (1981) Limited.* Report on prospecting and geochemical program Duke 1-16 claims (YB06331-YBo6346), Duke 17-24 claims (YB06904-YB06911), Duke 25-28 claims (YB06347-YB06350), Duke 29-44 claims (YB06912-YB06927); for Rockridge Mining Corporation, 1-10 p.

Eaton, W. D. (1988). Summary report on 1988 exploration, Arch property (Barny, Mus, Amp, and Eugene claims); performed for Pak-Man Resources Inc., Rockridge Mining Corporation and Kluane Joint Adventure. *Archer, Cathro and Associates (1981) Limited.* Summary report on 1988 exploration, Arch property (Barny, Mus, Amp, and Eugene claims); performed for Pak-Man Resources Inc., Rockridge Mining Corporation and Kluane Joint Adventure, 1-20 p.

Eaton, W. D. (1988). Summary report on 1988 exploration, Linda property (KLU 1-71 claims); performed for 2001 Resource Industries Ltd., Rockridge Mining Corporation and Kluane Joint Adventure. *Archer, Cathro and Associates (1981) Limited.* Summary report on 1988 exploration, Linda property (KLU 1-71 claims); performed for 2001 Resource Industries Ltd., Rockridge Mining Corporation and Kluane Joint Adventure, 1-22 p.

Eberlein, G. D., Churkin, J., M., Carter, C., Berg, H. C. & Ovenshine, A. T. (1983). Geology of the Craig quadrangle, Alaska. *U.S. Geological Survey.* Open-File Report 83-91, 4 sheets, scale 1:250,000, 53 p.

Eisenbacher, G. H. (1976). Sedimentalogy of the Dezadeash flysch and its implications for strike-slip faulting along the Denali Fault, Yukon Territory and Alaska. *Canadian Journal of Earth Sciences* **13**, 1495-1513.

Engebretson, D. C., Cox, A. & Gordon, R. G. (1985). Relative motions between oceanic and continental plates in the Pacific Basin. Special Paper- Geological Society of America 206, 59 p.

Enkin, R. J. (2006). Paleomagnetism and the case for Baja British Columbia. In: Haggart, J. W., Enkin, R. J. & Monger, J. W. H. (eds.) *Paleogeography of the North American Cordillera: Evidence For and Against Large-Scale Displacements*. Geological Association of Canada. Special Paper 46, pp. 233-253.

Fayak, M. (1989). The petrology, geochemistry, and economic geology of the pegmatitic gabbro and skarn rock from the Wellgreen deposit, Yukon Territory. B.Sc., Carleton University, 118 pp.

Forbes, R. B., Gilbert, W. & Redman, E. (1986). Geologic setting and petrology of the metavolcanic rocks in the northwestern part of the Skagway B-4 quadrangle, southeastern Alaska. *Alaska Division of Geological and Geophysical Surveys.* Geologic setting and petrology of the metavolcanic rocks in the northwestern part of the Skagway B-4 quadrangle, southeastern Alaska 89-14, 46 p. http://wwwdggs.dnr.state.ak.us/scan2/pdf89/text/PDF89-14.PDF.

Ford, A. B. & Brew, D. A. (1987). Major-element chemistry of metabasalts near the Juneau-Haines region, southeastern Alaska. *U. S. Geological Survey.* Circular 1016, 150-155 p.

Ford, A. B. & Brew, D. A. (1992). Geochemical character of Upper Paleozoic and Triassic Greenstone and related metavolcanic rocks of the Wrangellia terrane in northern Southeastern Alaska. *U. S. Geological Survey Circular.* Geologic studies in Alaska by the U. S. Geological Survey, 1992, 197-217 p.

Foster, H. L., Keith, T. E. C. & Menzie, W. D. (1987). Geology of east-central Alaska. *U. S. Geological Survey.* Open-File Report 87-188, 59 p.

Friedman, R. M. & Armstrong, R. L. (1995). Jurassic and Cretaceous geochronology of the southern Coast Belt, British Columbia, 49°-51°N. In: Miller, D. M. & Busby, C. (eds.) *Jurassic Magmatism and Tectonics of the North American Cordillera*. Geological Society of America Special Paper 299. pp. 95-139.

Fuis, G. S. (1998). West margin of North America -- a synthesis of recent seismic transects. *Tectonophysics* **288**(1-4), 265.

Furin, S., Preto, N., Rigo, M., Roghi, G., Gianolla, P., Crowley, J. L. & Bowring, S. A. (2006). High-precision U-Pb zircon age from the Triassic of Italy: Implications for the Triassic time scale and the Carnian origin of calcareous nannoplankton and dinosaurs. *Geology* **34**(12), 1009-1012, doi:10.1130/g22967a.1.

Fyles, J. T. (1955). Geology of the Cowichan Lake area, Vancouver Island, British Columbia. *British Columbia Ministry of Energy, Mines, and Petroleum Resources.* Bulletin 37, 79 p.

Gabrielse, H. & Yorath, C. J. (1989). DNAG #4. The Cordilleran orogen in Canada. In. Geological Survey of Canada Contribution No. 49388. pp. 67-83.

Galloway, J. P. & Laney, J. (1994). Status of geologic mapping in Alaska--A digital bibliography. *U. S. Geological Survey* Open-file report 94-675-B.

Gardner, M. C., Bergman, S. C., Cushing, G. W., MacKevett, E. M., Jr. , Plafker, G., Campbell, R. B., Dodds, C. J., McClelland, W. C. & Mueller, P. A. (1988). Pennsylvanian pluton stitching of Wrangellia and the Alexander terrane, Wrangell Mountains, Alaska. *Geology* **16**, 967-971.

Garver, J. I. & Brandon, M. T. (1994). Fission-track ages of detrtal zircons from Cretaceous strata, southern British Columbia: Implications for the Baja BC hypothesis. *Tectonics* **13**(2), 401-420.

Garver, J. I. & Scott, T. J. (1995). Trace elements in shale as indicators of crustal provenance and terrance accretion in the southern Canadian Cordillera. *GSA Bulletin* **107**(4), 440-453.

Gehrels, G. E. (1990). Late Proterozoic-Cambrian metamorphic basement of the Alexander terrane on Long and Dall Islands, southeast Alaska. *Geological Society of America Bulletin* **102**, 760-767.

Gehrels, G. E. (1991). Geologic Map of Long Island and central Dall Island, southeastern Alaska. *U.S. Geological Survey* Map MF-2146, 1 sheet, scale 1:63,360.

Gehrels, G. E. (1992). Geologic Map of southern Prince of Wales Island, southeastern Alaska. *U. S. Geological Survey.* Miscellaneous Investigations Series Map I-2169, 1 sheet, scale 1:63,360, 2 p.

Gehrels, G. E. (2000). Reconnaissance geology and U-Pb geochronology of the western flank of the Coast Mountains between Juneau and Skagway, southeastern Alaska. In: Stowell, H. H. & McClelland, W. C. (eds.) *Tectonics of the Coast Mountains, Southeastern Alaska and British Columbia*. Geological society of America Boulder, Colorado. Special Paper 343, pp. 213-234.

Gehrels, G. E. & Barker, F. (1992). Reconnaissance geochemistry of Permian and Triassic basalts of the Taku and Wrangellia terranes, Southeastern Alaska. *U. S. Geological Survey Geologic Circular.* Geologic studies in Alaska by the U. S. Geological Survey, 1992, 218-227 p.

Gehrels, G. E. & Berg, H. C. (1992). Geologic map of southeastern Alaska. *U. S. Geological Survey.* Miscellaneous Geologic Investigations Map I-1867, 1 sheet, scale 1:600,000, 24 p.

Gehrels, G. E. & Berg, H. C. (1994). Geology of southeastern Alaska. In: Plafker, G. & Berg, H. C. (eds.) *The Geology of North America*. Geological Society of America: Boulder, CO. The Geology of Alaska G-1, pp. 451-467.

Gehrels, G. E. & Boghossian, N. D. (2000). Reconnaissance geology and U-Pb geochronology of the west flank of the Coast Mountains between Bella Coola and Prince Rupert, coastal British Columbia. In: Stowell, H. H. & McClelland, W. C. (eds.) *Tectonics of the Coast Mountains, Southeastern Alaska and British Columbia*. Geological society of America Boulder, Colorado. Special Paper 343, pp. 61-76.

Gehrels, G. E., Butler, R. F. & Bazard, D. R. (1996). Detrital zircon geochronology of the Alexander terrane, southeastern Alaska. *Geological Society of America Bulletin* **108**(6), 722-734.

Gehrels, G. E., Dickinson, W. R., Ross, G. M., Stewart, J. H. & Howell, D. G. (1995). Detrital zircon reference for Cambrian to Triassic miogeoclinal strata of western North America. *Geology* **23**(9), 831-834.

Gehrels, G. E. & Greig, C. J. (1991). Late Jurassic detrital zircon link between the Alexander-Wrangellia terrane and Stikine and Yukon-Tanana terranes. *Geological Society of America Abstracts with Programs* **23**(5), A434.

Gehrels, G. E. & Kapp, P. A. (1998). Detrital zircon geochronology and regional correlation of metasedimentary rocks in the Coast Mountains, southeastern Alaska. *Canadian Journal of Earth Sciences* **35**, 269-279.

Gehrels, G. E., McClelland, W. C., Samson, S. D. & Patchett, P. J. (1991). U-Pb geochronology of detrital zircons from a continental margin assemblage in the northern Coast Mountains, southeastern Alaska. *Canadian Journal of Earth Sciences* **28**, 1285-1300.

Gehrels, G. E., McClelland, W. C., Samson, S. D., Patchett, P. J. & Jackson, J. L. (1990). Ancient continental margin assemblage in the northern Coast Mountains, southeast Alaska and northwest Canada. *Geology* **18**, 208-211.

Gehrels, G. E. & Saleeby, J. B. (1987). Geologic framework, tectonic evolution, and displacement history of the Alexander terrane. *Tectonics* **6**, 151-173.

Gehrels, G. E., Saleeby, J. B. & Berg, H. C. (1987). Geology of Annette, Gravina, and Duke Islands, southeastern Alaska. *Canadian Journal of Earth Sciences* **24**, 866-881.

Gilbert, W. G., Nye, C. J. & Sherwood, K. W. (1984). Stratigraphy, petrology, and geochemistry of Upper Triassic rocks from the Pingston and McKinley terranes, central Alaska Range. *Alaska Division of Geological and Geophysical Surveys.* Report of Investigations 84-30, 14 p.

Givens, C. R. & Suzuki, T. (1963). Late Triassic fauna from interlava sediments of east-central Vancouver Island. *Geological Society of America Cordilleran Section*, p. 35.

Glen, J. M. G., Schmidt, J. M. & Morin, R. (2007). Gravity and magnetic studies of the Talkeetna Mountains, Alaska: constraints on the geological and tectonic interpretation of southern Alaska, and implications for mineral exploration. In: Ridgway, K. D., Trop, J. M., O’Neill, J. M. & Glen, J. M. G. (eds.) *Tectonic Growth of a Collisional Continental Margin: Crustal Evolution of Southern Alaska*. Geological Society of America Special Paper 431, pp. 593-622.

Glen, J. M. G., Schmidt, J. M., Pellerin, L., O’Niell, M. & McPhee, D. K. (2007). Crustal structure of Wrangellia and adjacent terranes inferred from geophysical studies along a transect through the northern Talkeetna Mountains. In: Ridgway, K. D., Trop, J. M., O’Neill, J. M. & Glen, J. M. G. (eds.) *Tectonic Growth of a Collisional Continental Margin: Crustal Evolution of Southern Alaska*. Geological Society of America Special Paper 431. pp. 21-42.

Goodwin, E. B., Fuis, G. S., Nokleberg, W. J. & Ambos, E. L. (1989). The crustal structure of the Wrangellia terrane along the east Glenn Highway, eastern-southern Alaska. *Journal of Geophysical Research* **94**, 16,037-16057.

Gordey, S. P. & Makepeace, A. J., (compilers) (2000). Yukon Digital Geology. *Geological Survey of Canada* Open File D3826 or Exploration and Geological Services Division (EGSD), Yukon Region, Indian and Northern Affairs Canada (DIAND).

Grantz, A., Jones, D. L. & Lanphere, M. A. (1966). Stratigraphy, paleontology, and isotopic ages of upper Mesozoic rocks in the southwestern Wrangell Mountains, Alaska. *U. S. Geological Survey*  Professional Paper 550-C, 39-47 p.

Green, K. C. (1986). Petrology of the volcanic rocks of the Karmutsen Formation, Ikeda Cove, Queen Charlotte Islands, British Columbia. Bachelor's, University of British Columbia, 37 pp.

Greene, A., Scoates, J. S., Weis, D. & Kieffer, B. (2006). Wrangellia Flood Basalts: Exploring the architecture and composition of an accreted oceanic plateau. *Geological Society of America Cordilleran Section*, Anchorage, Alaska. 38: 5, p. 25.

Greene, A. R., Scoates, J. S., Nixon, G. T. & Weis, D. (2006). Picritic lavas and basal sills in the Karmutsen flood basalt province, Wrangellia, northern Vancouver Island. In: Grant, B. (ed.) *Geological Fieldwork 2005*. British Columbia Ministry of Energy, Mines and Petroleum Resources. Paper 2006-1, pp. 39-52.

Greene, A. R., Scoates, J. S. & Weis, D. (2005). Wrangellia Terrane in B.C. and Yukon: Where are its Ni-Cu-PGE deposits? *Cordilleran Mineral Roundup Expo*, Vancouver, BC.

Greene, A. R., Scoates, J. S. & Weis, D. (2005). Wrangellia Terrane on Vancouver Island: Distribution of flood basalts with implications for potential Ni-Cu-PGE mineralization. In: Grant, B. (ed.) *Geological Fieldwork 2004*. British Columbia Ministry of Energy, Mines and Petroleum Resources. Paper 2005-1, pp. 209-220.

Greene, A. R., Scoates, J. S. & Weis, D. (2008). Wrangellia flood basalts in Alaska: A record of plume-lithosphere interaction in a Late Triassic accreted oceanic plateau. *Goldschmidt 2008 Conference*, Vancouver, BC.

Greene, A. R., Scoates, J. S. & Weis, D. (2008, submitted). Wrangellia flood basalts in Alaska: A record of plume-lithosphere interaction in a Late Triassic accreted oceanic plateau. *Geochemistry Geophysics Geosystems*.

Greene, A. R., Scoates, J. S., Weis, D. & Israel, S. (2005). Flood basalts of the Wrangellia Terrane, southwest Yukon: Implications for the formation of oceanic plateaus, continental crust and Ni-Cu-PGE mineralization. In: Emond, D. S., Lewis, L. L. & Bradshaw, G. D. (eds.) *Yukon Exploration and Geology 2004*. Yukon Geological Survey. pp. 109-120.

Greene, A. R., Scoates, J. S., Weis, D. & Israel, S. (2008, submitted). Geochemistry of flood basalts from the Yukon (Canada) segment of the accreted Wrangellia oceanic plateau. *Lithos*.

Greene, A. R., Scoates, J. S., Weis, D., Israel, S., Nixon, G. T. & Kieffer, B. (2007). Geochemistry and geochronology of the Wrangellia Flood Basalts in British Columbia, Yukon, and Alaska. *Cordilleran Mineral Roundup Expo*, Vancouver, BC.

Greene, A. R., Scoates, J. S., Weis, D., Katvala, E. C., Israel, S. & Nixon, G. T. (2008, submitted). The age and volcanic stratigraphy of the accreted Wrangellia oceanic plateau in Alaska, Yukon, and British Columbia. *Geosphere*.

Greene, A. R., Scoates, J. S., Weis, D. & Kieffer, B. (2006). Wrangellia Flood Basalts: Exploring the architecture and composition of an accreted oceanic plateau. *Geological Association of Canada 2006 Annual Meeting*, Montreal, Quebec.

Greene, A. R., Scoates, J. S., Weis, D. & Nixon, G. T. (2008). Picritic and tholeiitic lavas within Wrangellia Flood Basalts on Vancouver Island for the melting history and magmatic evolution of a major oceanic plateau. *Cordilleran Tectonics Workshop*, Vancouver, BC.

Greene, A. R., Scoates, J. S., Weis, D., Nixon, G. T. & Kieffer, B. (2008, submitted). Wrangellia flood basalts on Vancouver Island: Significance of picritic and tholeiitic lavas for the melting history and magmatic evolution of a major oceanic plateau. *Journal of Petrology*.

Greene, A. R., Weis, D. & Scoates, J. S. (2007). Wrangellia Flood Basalts: Exploring the architecture and composition of an accreted oceanic plateau. *Geological Association of Canada, NUNA 2007 Conference: The Pulse of the Earth and Planetary Evolution*, Sudbury, Ontario.

Greenwood, H. J., Woodsworth, G. J., Read, P. B., Ghent, E. D. & Evenchick, C. A. (1991). Metamorphism; Chapter 16. In: Gabrielse, H. & Yorath, C. J. (eds.) *Geology of the Cordilleran Orogen in Canada*. Geological Survey of Canada. Geology of Canada 4, pp. 533-570.

Gunning, H. C. (1930). Geology and mineral deposits of Quatsino-Nimpkish area, Vancouver Island. *Geological Survey of Canada.* Summary Report 1929, Part A, 94-143 p.

Gunning, H. C. (1931). Buttle Lake map-area, Vancouver Island, British Columbia. *Geological Survey of Canada.* Summary Report 1930, Part A, 56-78 p.

Gunning, H. C. (1932). Preliminary report on the Nimpkish Lake Quadrangle, Vancouver Island, B. C. *Geological Survey of Canada.* Summary Report 1931, Part A, 22-35 p.

Haeussler, P. J., Gehrels, G. E. & Karl, S. M. (2006). Constraints on the age and provenance of the Chugach accretionary complex from detrital zircons in the Sitka Graywacke near Sitka, Alaska. *U.S. Geological Survey* Professional Paper 1709-F http://pubs.usgs.gov/pp/pp1709f/

Hamilton, T. S. & Dostal, J. (1993). Geology, geochemistry and petrogenesis of Middle Tertiary volcanic rocks of the Queen Charlotte Islands, British Columbia (Canada). *Journal of Volcanology and Geothermal Research* **59**, 77-99.

Hamilton, W. (1978). Mesozoic tectonics of the western United States. In: Howell, D. G. & McDougall, K. A. (eds.) *Mesozoic Paleogeography of the Western United States*. Pacific Section, Society of Economic Paleontologists and Mineralogists, Pacific Coast Paleogeography Symposium 2. pp. 33-70.

Hamilton, W. (1987). Plate-tectonic evolution of the western U. S. A. *Episodes* **10**( no. 4), 271-276.

Hamilton, W. (1988). Tectonic setting and variations with depth of some Cretaceous and Cenozoic structural and magmatic systems of the western United States. In: Ernst, W. G. (ed.) *Metamorphism and Crustal Evolution of the Western United States*. Prentice Hall: Englewood Cliffs, N. J. Rubey Volume VII, pp. 1-40.

Hammack, J. L., Nixon, G. T., Payie, G. J., Snyder, L. D., Haggart, J. W., Massey, N. W. D. & Barron, D. (1995). Preliminary Geology of the Quatsino - Port McNeill map areas, northern Vancouver Island (92L/12, 11) Preliminary Geology of the Quatsino - Port McNeill map areas, northern Vancouver Island (92L/12, 11). scale 1:50,000

Hammer, P. T. C. & Clowes, R. M. (2004). Accreted terranes of northwestern British Columbia, Canada: Lithosphereic velocity structure and tectonics. *Journal of Geophysical Research* **109**(B06305), 19, doi:10.1029/2003JB002749.

Hampton, B. A., Ridgway, K. D., O’Neill, J. M., Gehrels, G. E., Schmidt, J. M. & Blodgett, R. B. (2007). Pre-, syn-, and post-collisional stratigraphic framework and provenance of Upper Triassic-Upper Cretaceous strata in the northwestern Talkeetna Mountains, Alaska. In: Ridgway, K. D., Trop, J. M., Glen, J. & O'Neill, J. M. (eds.) *Tectonic Growth of a Collisional Continental Margin: Crustal Evolution of Southern Alaska*. Geological Society of America. Special Paper 431, pp.

Hansen, V. L., Goodge, J. W., Keep, M. & Oliver, D. H. (1993). Asymmetric rift interpretation of the western North American margin. *Geology* **21**, 1067-1070.

Hawley, C. C. & Clark, A. L. (1974). Geology and mineral deposits of the Upper Chulitna district, Alaska. *U. S. Geological Survey.* Professional Paper 758-B, B1-B47 p.

Henstock, T. J., Levander, A., Snelson, C. M., Keller, G. R., Miller, K. C., Harder, S. H., Gorman, A. R., Clowes, R. M., Burianyk, M. J. A. & Humphreys, E. D. (1998). Probing the Archean and Proterozoic Lithosphere of Western North America. *GSA Today* **8**(7), 1-16.

Herreid, G., Bundtzen, T. K. & Turner, D. L. (1978). Geology and geochemistry of the Craig A-2 quadrangle and vicinity, Prince of Wales Island, Craig quadrangle, Alaska. *Alaska Division of Geological and Geophysical Surveys.* Geochemical Report, 48, 49 p., scale 1:40,000.

Hesthammer, J., Indrelid, J., Lewis, P. D. & Orchard, M. J. (1991). Permian strata on the Queen Charlotte Islands, British Columbia. Current Research, Part A, Cordillera and Pacific margin. *Geological Survey of Canada.* Report 91-01A, 321-329 p.

Hillhouse, J. W. (1977). Paleomagnetism of the Triassic Nikolai Greenstone, McCarthy Quadrangle, Alaska. *Canadian Journal of Earth Sciences* **14**, 2578-3592.

Hillhouse, J. W. & Coe, R. S. (1994). Paleomagnetic data from Alaska. In: Plafker, G. & Berg, H. C. (eds.) *The Geology of Alaska*. Geological Society of America. Geology of North America G-1, pp. 797-812.

Hillhouse, J. W. & Gromme, C. S. (1984). Northward displacement and accretion of Wrangellia: New paleomagnetic evidence from Alaska. *Journal of Geophysical Research* **89**, 4461-4467.

Hillhouse, J. W., Gromme, C. S. & Vallier, T. L. (1982). Paleomagnetism and Mesozoic tectonics of the Seven Devils volcanic arc in northeastern Oregon *Journal of Geophysical Research* **B87**(5), 3777-3794.

Himmelberg, G. R. & Loney, R. A. (1995). Characteristics and Petrogenesis of Alaskan-Type Ultramafic-Mafic Intrusions, southeastern Alaska. *U.S. Geological Survey* Professional Paper 1564, 47 p.

Himmelberg, G. R., Loney, R. A. & Craig, J. T. (1986). Petrogenesis of the ultramafic complex at the Blashke Islands, southeastern Alaska. *U.S. Geological Survey.* Bulletin 1662 1662, 14 p.

Hoadley, J. W. (1953). Geology and mineral deposits of the Zeballos-Nimpkish area, Vancouver Island, British Columbia. *Geological Survey of Canada.* Memoir 272, 82 p.

Housen, B. A. & Beck, M. E. J. (1999). Testing terrane transport: An inclusive approach to the Baja B.C. controversy. *Geology* **27**(12), 1143-1146.

Hudson, T. (1979). Mesozoic plutonic belts of southern Alaska. *Geology* **7**, 230-234.

Hudson, T. (1983). Calk-alkaline plutonism along the Pacific Rim of southern Alaska. In: Roddick, J. A. (ed.) *Circum-Pacific Plutonic Terranes*. Geological Society of America Memoir 159. pp. 159-169.

Hulbert, L. (1996). Wrangellia- A new Ni-Cu-PGE metallogenic terrane. *British Columbia Geological Survey, British Columbia Mineral Deposit Profiles.* New Mineral Deposit Models of the Cordillera, 1996 Short Course, 3-30 p.

Hulbert, L. J. (1997). Geology and metallogeny of the Kluane mafic-ultramafic belt, Yukon Territory, Canada : eastern Wrangellia - a new Ni-Cu-PGE metallogenic terrane. *Geological Survey of Canada Bulletin.* Bulletin 506, Ottawa, 265 p.

Hults, C. K. (2002). Paleomagnetism of the Jura-Cretaceous Kyuquot Group, Vancouver Island, British Columbia. M. Sc., Western Washington University, 81 pp.

Hunt, W. R. (1996). *Mountain Wilderness: An Illustrated History of the Wrangell-St. Elias National Park and Preserve, Alaska*. Alaska Natural History Association: Anchorage, 224 p.

Imlay, R. W. (1984). Early and Middle Bajocian (Middle Jurassic) ammonites from southern Alaska. *U. S. Geological Survey.* Professional Paper 1322, 38 p.

Imlay, R. W. & Detterman, R. L. (1973). Jurassic paleobiogeography of Alaska. *U. S. Geological Survey* Professional Paper 801, 34 p.

Irving, E. & Wynne, P. J. (1990). Paleomagnetic evidence bearing on the evolution of the Canadian Cordillera. *Philosophical Transactions Royal Society of London* **331**, 487-509.

Irving, E. & Yole, R. W. (1972). Paleomagnetism and kinematic history of mafic and ultramafic rocks in fold mountain belts. *Earth Physics Branch Publications* **42**, 87-95.

Isachsen, C. E. (1984). Geology, geochemistry, and geochronology of the Westcoast Crystalline Complex and related rocks, Vancouver Island, British Columbia. M. Sc., University of British Columbia, 144 pp.

Isachsen, C. E. (1987). Geology, geochemistry, and cooling history of the Westcoast Crystalline Complex and related rocks, Meares Island and vicinity, Vancouver Island, British Columbia. *Canadian Journal of Earth Sciences* **24**, 2047-2064.

Israel, S. (2004). Geology of Southwestern Yukon. *Yukon Geological Survey* Open File 2004-16. scale 1:250 000

Israel, S., Cobbett, R. & Fozard, C. (2007). Bedrock geology of the Koidern River area (parts of NTS 115F/9, 15, 16 and 115G/12), Yukon (1:50 000 scale). *Yukon Geological Survey.* Open File 2007-8.

Israel, S., Cobbett, R. & Fozard, C. (2007). Bedrock geology of the Miles Ridge area (parts of NTS 115F/15, 16 and 115K/1, 2), Yukon (1:50 000 scale). *Yukon Geological Survey.* Open File 2007-7.

Israel, S., Tizzard, A. & Major, J. (2005). Geological map of the Duke River area (parts of NTS 115G/2, 3, 5, 6, 7), Yukon (1:50 000 scale). *Yukon Geological Survey.* Open File 2005-11.

Israel, S., Tizzard, A. & Major, J. (2006). Bedrock geology of the Duke River area, parts of NTS 115G/2, 3, 4, 6 and 7, southwestern Yukon. In: Emond, D. S., Bradshaw, G. D., Lewis, L. L. & Weston, L. H. (eds.) *Yukon Exploration and Geology 2005*. Yukon Geological Survey. pp. 139-154.

Israel, S. & Van Zeyl, D. (2004). Preliminary geological map of the Quill Creek area (parts of NTS 115G/5,6,12), southwest Yukon (1:50,000 scale). *Yukon Geological Survey.* Open File 2004-20.

Israel, S. & Van Zeyl, D. P. (2005). Preliminary geology of the Quill Creek map area, southwest Yukon parts of NTS 115G/5, 6 and 12. In: Emond, D. S., Lewis, L. L. & Bradshaw, G. D. (eds.) *Yukon Exploration and Geology 2004*. Yukon Geological Survey. pp. 129-146.

Jackson, J. L., Gehrels, G. E., Patchett, P. J. & Mihalynuk, M. G. (1991). Stratigraphic and isotopic link between the northern Stikine terrane and an ancient continental margin assemblage, Canadian Cordillera. *Geology* **19**, 1177-1180.

Jeffery, W. G. (1962). Preliminary geologic map, Alice Lake-Benson Lake area. *British Columbia Ministry of Energy, Mines, and Petroleum Resources.* Preliminary geologic map, Alice Lake-Benson Lake area.

Jeffery, W. G. (1967). Buttle Lake. *British Columbia Ministry of Energy, Mines, and Petroleum Resources.* Miscellaneous Open-file Report, 67 p.

Jeletzky, J. A. (1950). Stratigraphy of the west coast of Vancouver Island between Kyuquot Sound and Esperenza Inlet, British Columbia. *Geological Survey of Canada.* Paper 50-57.

Jeletzky, J. A. (1970). Some salient features of Early Mesozoic history of Insular Tectonic Belt, western British Columbia. *Geological Survey of Canada.* Paper 69-14, 26 p.

Jeletzky, J. A. (1976). Mesozoic and Tertiary rocks of Quatsino Sound, Vancouver Island, British Columbia. *Geological Survey of Canada.* Bulletin 242, 243 p.

Johnson, B. R. & Karl, S. M. (1985). Geologic map of western Chichagof and Yakobi Islands, southeastern Alaska. *U. S. Geological Survey* Miscellaneous Investigations Series Map I-1506.

Johnson, B. R. & Karl, S. M. (1985). Geologic map of western Chichagof and Yakobi Islands, southeastern Alaska. *U. S. Geological Survey* Miscellaneous Investigations Map I-1506. 1:125,000.

Jones, D. L. (1963). Upper Cretaceous (Campanian and Maestrichtian) ammonites from southern Alaska. *U. S. Geological Survey.* Professional Paper 432, 53 p.

Jones, D. L. (1990). Synopsis of late Paleozoic and Mesozoic terrane accretion within the cordillera of western North America. *Philosophical Transactions Royal Society of London* **A331**, 479-486.

Jones, D. L., Cox, A., Coney, P. & Beck, M. (1982). The growth of western North America. *Scientific American*, 50.

Jones, D. L. & Silberling, N. J. (1979). Mesozoic stratigraphy- The key to tectonic analysis of southern and central Alaska. *U. S. Geological Survey.* Open-File Report 79-1200, 37 p.

Jones, D. L. & Silberling, N. J. (1982). Mesozoic stratigraphy key to tectonic analysis of southern Alaska and central Alaska. In: Leviton, A. E. (ed.) *Frontiers of Geological Exploration in Northwestern North America*. Pacific Division, American Association of Petroleum Geologists: San Francisco, California. pp. 139-153.

Jones, D. L., Silberling, N. J. & Coney, P. J. (1986). Collision tectonics in the Cordillera of western N. America: examples from Alaska. In: Coward, M. P. & Reis, A. C. (eds.) *Collision Tectonics*. Geological Society Special Publication, No. 19. pp. 367-387.

Jones, D. L., Silberling, N. J. & Coney, P. J. (1987). Lithotectonic terrane map of Alaska (west of the 141st Meridian). *U. S. Geological Survey* Miscellaneous Field Studies Map MF-1874A. scale 1:2,500,000, 1 sheet.

Jones, D. L., Silberling, N. J., Gilbert, W. & Coney, P. J. (1982). Character, distribution, and tectonic significance of accretionary terranes in the central Alaska Range. *Journal of Geophysical Research* **87**, 3709-3717.

Jones, D. L., Silberling, N. J. & Hillhouse, J. (1977). Wrangellia; a displaced terrane in northwestern North America. *Canadian Journal of Earth Sciences* **14**(11), 2565-2577.

Juras, S. J. (1987). Geology of the polymetallic volcanogenic Buttle Lake Camp, with emphasis on the Prince Hillside, Vancouver Island, British Columbia, Canada. Unpublished Ph.D. dissertation, University of British Columbia, 279 pp.

Karl, S. M., Decker, J. E. & Johnson, B. R. (1982). Discrimination of Wrangellia and the Chugach terrane in the Kelp Bay Group on Chichagof and Baranof Islands, southeastern Alaska. *U. S. Geological Survey.* Circular 844, 124-128 p.

Karl, S. M., Haeussler, P. J., Friedman, R. M., Mortensen, J. K., Himmelberg, G. R. & Zumsteg, C. L. (2006). Late Proterozoic ages for rocks on Mount Cheetdeekahyu and Admiralty Island, Alexander terrane, southeast Alaska. *Geological Society of America Abstracts with Programs* **38**(5), 20.

Karl, S. M., Haeussler, P. J. & McCafferty, A. (1999). Reconnaissance geologic map of the Duncan Canal-Zarembo Island area, southeastern Alaska. *U. S. Geological Survey* Open-File Report 99-168, scale 1:150,000 http://geopubs.wr.usgs.gov/open-file/of99-168/.

Katvala, E. C. & Henderson, C. M. (2002). Conodont sequence biostratigraphy and paleogeography of the Pennsylvanian-Permian Mount Mark and Fourth Lake Formations, southern Vancouver Island. In: Hills, L. V., Henderson, C. M. & Bamber, E. W. (eds.) *Carboniferous and Permian of the World*. Canadian Society of Petroleum Geologists Memoir 19. pp. 461-478.

Katvala, E. C. & Stanley, G. D., Jr. (2008, in press). Conodont biostratigraphy and facies correlations in a Late Triassic island arc, Keku Strait, Southeast Alaska. In: Blodgett, R. B. & Stanley, G. D., Jr. (eds.) *The Terrane Puzzle: New Perspectives on Paleontology and Stratigraphy from the North American Cordillera*. Geological Society of America. Special Paper 442, pp.

Kindle, E. D. (1953). Dezadeash map-area, Yukon Territory. *Canadian Geological Survey.* Memoir 268, 68 p.

Kuniyoshi, S. (1972). Petrology of the Karmutsen (Volcanic) Group, northeastern Vancouver Island, British Columbia. Unpublished Ph.D. dissertation, University of California, Los Angeles, 242 pp.

Kuniyoshi, S. & Liou, J. G. (1976). Contact metamorphism of the Karmutsen volcanics, Vancouver Island, British Columbia. *Journal of Petrology* **17**, 73-99.

Kveton, K. J. (1987). Oldest known basement of the Wrangellia Terrane; middle Paleozoic volcanic arc in the Gulf Islands, SW British Columbia. *Geological Society of America Abstracts with Programs* **19**(7), 736.

Lang, A. H. & Muller, J. E. (1975). *The Geology of Long Beach Segment Pacific Rim National Park and its Approaches*. Geological Survey of Canada: Ottawa, ON, Canada, 56 p.

Lang, J. R., Lueck, B., Mortenson, J. K., Russell, J. K., Stanley, C. R. & Thompson, J. F. H. (1995). Triassic-Jurassic silica-undersaturated and silica-saturated alkalic intrusions in the Cordillera of British Columbia: Implications for arc magmatism. *Geology* **23**(5), 451-454.

Lanphere, M. A., MacKevett, E. M., Jr. & Stern, T. W. (1964). Potassium argon and lead-alpha ages of plutonic rocks, Bokan Mountain area, Alaska. *Science* **145**, 705-707.

Lanphere, M. A. & Reed, B. L. (1973). Timing of Mesozoic and Cenozoic Plutonic Events in Circum-Pacific North America. *Geological Society of America Bulletin* **84**, 3773-3782.

Lassiter, J. C. (1995). Geochemical investigations of plume-related lavas: constraints on the structure of mantle plumes and the nature of plume/lithosphere interactions. Unpublished Ph.D. dissertation (chapter 2), University of California, Berkeley, 231 pp.

Lassiter, J. C., DePaolo, D. J. & Mahoney, J. J. (1995). Geochemistry of the Wrangellia flood basalt province: Implications for the role of continental and oceanic lithosphere in flood basalt genesis. *Journal of Petrology* **36**(4), 983-1009.

LeHuray, A. P., Church, S. E. & Nokleberg, W. J. (1985). Lead isotopes in sulfide deposits in the Jarvis Creek Glacier and Wrangellia terranes, Mount Hayes Quadrangle, Eastern Alaska Range. *U. S. Geological Survey.* Circular C 0945, 72-73 p.

Lewis, P. D., Haggart, J. W., Anderson, R. G., Hickson, C. J., Thompson, R. I., Dietrich, J. R. & Rohr, K. M. M. (1991). Triassic to Neogene geological evolution of the Queen Charlotte region. *Canadian Journal of Earth Sciences* **28**(6), 854-869.

Lincoln, T. N. (1978). The redistribution of copper during metamorphism of the Karmutsen Volcanics, Vancouver Island, British Columbia. Published Ph.D., UCLA, 236 pp.

Lincoln, T. N. (1981). The redistribution of copper during metamorphism of the Karmutsen Volcanics, Vancouver Island, British Columbia. *Economic Geology* **76**, 2147-2161.

Lincoln, T. N. (1986). Minor and trace element chemistry and environment of eruption of Karmutsen pillow lavas, Vancouver Island, B. C. *Geological Association of Canada Program with Abstracts*, 11, p. 95.

Lindline, J., Crawford, M. L., Crawford, W. A. & Gehrels, G. E. (1998). Petrology, geochemistry and geochronology of Admiralty-Revillagigedo belt granitoids near Wrangell, SE Alaska. *Geological Society of America Abstracts with Programs* **30**(7), 378.

Lindline, J., Crawford, W. A., Crawford, M. L. & Omar, G. I. (2000). Post-accretionary magmatism within the Kuiu-Etolin igneous belt, southeastern Alaska. *Canadian Mineralogist* **38**, 951-974.

Little, T. A. & Naeser, C. W. (1989). Tertiary tectonics of the Border Ranges Fault System, Chugach Mountains, Alaska: Deformation and uplift in a forearc setting. *Journal of Geophysical Research* **94**(B4), 4333-4359.

Loney, A. R., Brew, D. A., Muffler, L. J. P. & Pomeroy, J. S. (1975). Reconnaissance geology of Chichagof, Baranof, and Kruzof Islands, southeastern Alaska. *U. S. Geological Survey.* Professional Paper 792, 105 p.

Loney, R. A. (1964). Stratigraphy and petrography of the Pybus-Gambier area, Admiralty Island, Alaska. *U. S. Geological Survey.* Bulletin 1178.

Loney, R. A. & Himmelberg, G. R. (1992). Petrogenesis if Pd-rich intrusion at Salt Chuck, Prince of Wales Island: an Early Paleozoic Alaskan-type ultramafic body. *Canadian Minerologist* **30**, 1005-1022.

Loney, R. A., Himmelberg, G. R. & Shew, N. (1987). Salt Chuck palladium-bearing ultramafic body, Prince of Wales Island. *U.S. Geological Survey* Circular 998, 126-127 p.

Lowey, G. (1998). A new estimate of the amount of displacement on the Denali fault system based on the occurrence of carbonate megaboulders in the Dezadeash formation (Jura-Cretaceous), Yukon, and the Nutzotin Mountains sequence (Jura-Cretaceous), Alaska. *Bulletin of Canadian Petroleum Geology* **46**(3), 379-386.

Lowey, G. W. (2007). Lithofacies analysis of the Dezadeash Formation (Jura-Cretaceous), Yukon, Canada: The depositional architecture of a mud/sand-rich turbidite system. *Sedimentary Geology* **198**(3-4), 273.

Ludvigsen, R. & Beard, G. (1997). *West Coast Fossils: A Guide to the Ancient Life of Vancouver Island, Second Edition*. Harbour Publishing: Medeira Park, B.C., 216 p.

Lyatsky, H. V. & Haggart, J. W. (1992). Queen Charlotte basin off western Canada may hold oil, gas potential. *Oil and Gas Journal*(August), 53-56.

Lynch, G. (1995). Geochemical polarity of the Early Cretaceous Gambier Group, southern Coast Belt, British Columbia. *Canadian Journal of Earth Sciences* **32**, 675-685.

MacIntyre, D. G. (1986). The geochemistry of basalts hosting massive sulfide deposits, Alexander terrane, northwest British Columbia. *British Columbia Ministry of Energy, Mines, and Petroleum Resources.* The geochemistry of basalts hosting massive sulfide deposits, Alexander terrane, northwest British Columbia Paper 1986-1, 197-210 p.

MacKevett, E. M., Jr. (1970). Geologic map of the McCarthy C-4 Quadrangle, Alaska. *U. S. Geological Survey.* Map GQ-844, scale 1:63,360.

MacKevett, E. M., Jr. (1970). Geologic map of the McCarthy C-5 Quadrangle, Alaska. *U. S. Geological Survey.* Map GQ-899, scale 1:63,360.

MacKevett, E. M., Jr. (1970). Geology of the McCarthy B-4 quadrangle, Alaska. *U. S. Geological Survey.* Bulletin 1333, 31 p.

MacKevett, E. M., Jr. (1971). Stratigraphy and general geology of the McCarthy C-5 Quadrangle, Alaska. *U. S. Geological Survey.* Bulletin 1323, 35 p.

MacKevett, E. M., Jr. (1972). Geologic map of the McCarthy C-6 Quadrangle, Alaska. *U. S. Geological Survey.* Map GQ-979, scale 1:63,360.

MacKevett, E. M., Jr. (1974). Geologic map of the McCarthy B-5 quadrangle, Alaska. *U.S. Geological Survey.* Map GQ-1146, scale 1:63,360.

MacKevett, E. M., Jr. (1978). Geologic map of the McCarthy Quadrangle, Alaska. *U. S. Geological Survey.* Miscellaneous Investigations Series Map I-1032 scale 1:250,000.

MacKevett, E. M., Jr., Berg, H. C., Plafker, G. & Jones, D. L. (1964). Prelimary geologic map of the McCarthy C-4 quadrangle, Alaska. *U. S. Geological Survey.* Miscellaneous Geological Investigations Map I-423, scale 1:63,360.

MacKevett, E. M., Jr., Cox, D. P., Potter, R. P. & Silberman, M. L. (1997). Kennecott-type deposits in the Wrangell Mountains, Alaska: High-grade copper ores near a basalt-limestone contact. In: Goldfarb, R. J. & Miller, L. D. (eds.) *Mineral Deposits of Alaska*. Economic Geology Monograph 9, pp. 66-89.

MacKevett, E. M., Jr., Gardner, M. C., Bergman, S. C. & Cushman, G. (1986). Geological evidence for Late Pennsylvanian juxtaposition of Wrangellia and the Alexander terrane, Alaska. *Geological Society of America Abstracts with Programs* **18**, 128.

MacKevett, E. M., Jr. & Plafker, G. (1974). The Border Ranges fault in south-central Alaska. *U. S. Geological Survey.* Journal of Research 2, 323-329 p.

MacKevett, E. M., Jr. & Richter, D. H. (1974). The Nikolai Greenstone in the Wrangell Mountains, Alaska and nearby areas. *Geological Association of Canada, Cordilleran Section, Program and Abstracts*, 13-14.

MacKevett, E. M., Jr. & Smith, J. G. (1972). Geologic map of the McCarthy B-4 quadrangle, Alaska. *U.S. Geological Survey.* Map GQ-943, scale 1:63,360.

MacKevett, E. M., Jr., Smith, J. G., Jones, D. L. & Winkler, G. R. (1978). Geologic map of the McCarthy C-8 quadrangle, Alaska. *U.S. Geological Survey.* Map GQ-1418, scale 1:63,360.

Mahoney, J. B., Mustard, P. S., Haggart, J. W., Friedman, R. M., Fanning, C. M. & McNicoll, V. J. (1999). Archean zircons in Cretaceous strata of the western Canadian Cordillera: The "Baja B.C." hypothesis fails a "crucial test". *Geology* **27**(3), 195-198.

Main, C. A. & Davis, D. C. (1989). Report on geophysical and geochemical surveys: Onion 1-13, Onion 14-25, NTS 115F/15 and 115k/2 latitude 62 degrees 00minutes; longitude 140 degree 37 minutes; performed for Rexford Minerals Ltd. and Kluane Joint Venture. *Archer, Cathro and Associates (1981) Limited.* Report on geophysical and geochemical surveys: Onion 1-13, Onion 14-25, NTS 115F/15 and 115k/2 latitude 62 degrees 00minutes; longitude 140 degree 37 minutes; performed for Rexford Minerals Ltd. and Kluane Joint Venture, 1-21 p.

Malmquist, D. L. (1991). Galápagos Islands: A Holocene analogue to the Wallowa accreted terrane, western North America. *Geology* **19**, 675-678.

Marcantonio, F., Reisberg, L., Zindler, A., Hulbert, L., England, J. & Wyman, D. (1991). Re-Os isotope evidence for the genesis of the Wellgreen Ni-Cu-PGE deposit. *Eos* **72**, 530.

Marcantonio, F., Reisberg, L., Zindler, A., Hulbert, L. & Wyman, D. (1994). An isotopic study of the Ni-Cu-PGE-rich Wellgreen intrusion of the Wrangellia Terrane: evidence for hydrothermal mobilization of Re and Os. *Geochimica et Cosmochimica Acta* **58**, 1007-1018.

Massey, N. W. D. (1995). Geology and mineral resources of the Alberni-Nanaimo Lakes sheet, Vancouver Island 92F/1W, 92F/2E, and part of 92F/7E. *B.C. Ministry of Energy, Mines and Petroleum Resources.* Paper 1992-2, 132 p.

Massey, N. W. D. (1995). Geology and mineral resources of the Cowichan Lake sheet, Vancouver Island 92C/16. *B.C. Ministry of Energy, Mines and Petroleum Resources.* Paper 1992-3, 112 p.

Massey, N. W. D. (1995). Geology and mineral resources of the Duncan sheet, Vancouver Island 92B/13. *B.C. Ministry of Energy, Mines and Petroleum Resources.* Paper 1992-4, 112 p.

Massey, N. W. D. & Friday, S. J. (1987). Geology of the Cowichan Lake Area, Vancouver Island (92C/16). In: *Geological Fieldwork 1986*. B.C. Ministry of Energy, Mines and Petroleum Resources. Paper 1987-1, pp. 223-229.

Massey, N. W. D. & Friday, S. J. (1988). Geology of the Chemainus River-Duncan Area, Vancouver Island (92C/16; 92B/13). In: *Geological Fieldwork 1987*. B.C. Ministry of Energy, Mines and Petroleum Resources Paper 1988-1. pp. 81-91.

Massey, N. W. D. & Friday, S. J. (1989). Geology of the Alberni-Nanaimo Lakes Area, Vancouver Island (91F/1W, 92F/2E and part of 92F/7). In: *Geological Fieldwork 1987*. B.C. Ministry of Energy, Mines and Petroleum Resources. Paper 1989-1, pp. 61-74.

McClelland, W. C., Gehrels, G. E. & Saleeby, J. B. (1992). Upper Jurassic-Lower Cretaceous basinal strata along the Cordilleran margin: Implication for the accretionary history of the Alexander-Wrangellia-Peninsular terranes. *Tectonics* **11**, 823-835.

Mendenhall, W. C. (1900). A reconnaissance from Resurrection Bay to Tanana River, Alaska, in 1898. *U. S. Geological Survey.* Twentieth Annual Report, pt. 7, 271-340 p.

Mendenhall, W. C. & Schrader, F. C. (1903). Mineral resources of the Mt. Wrangell district, Alaska. *U. S. Geological Survey.* Professional Paper 15.

Miller, S. (1991). Geology, petrology and geochemistry of the host rocks and associated Ni-Cu-PGE disseminated mineralization of the Wellgreen deposit, Kluane Ranges, Yukon Territory. M.Sc., McMaster University, 249 pp.

Moffit, F. H. (1912). Headwater regions of Gulkana and Susitna River, Alaska, with accounts of the Valdez Creek and Chistochina placer districts. *U. S. Geological Survey.* Bulletin 498, 82 p.

Moffit, F. H. (1954). Geology of the eastern part of the Alaska Range and adjacent area. *U. S. Geological Survey.* Bulletin 989-C, 65-218 p.

Monger, J. W. H. (1984). Cordilleran tectonics: A Canadian perspective. *Bulletin de la Société Géologique de France* **7, t. XXVI**(2), 255-278.

Monger, J. W. H. & Berg, H. C. (1987). Lithotectonic terrane map of western Canada and southeastern Alaska. *U. S. Geological Survey* Miscellaneous Field Studies MapMF-1874B. scale 1:2,500,000, 1 sheet.

Monger, J. W. H., Gabrielse, H. & Souther, J. G. (1972). Evolution of the Canadian Cordillera: a plate tectonic model. *American Journal of Science* **272**, 577-602.

Monger, J. W. H. & Journeay, J. M. (1994). Basement geology and tectonic evolution of the Vancouver region. In: Monger, J. W. H. (ed.) *Geology and Geological Hazards of the Vancouver Region, Southwestern British Columbia*. Geological Survey of Canada Bulletin, 481. pp. 3-25.

Monger, J. W. H. & Journeay, J. M. (1994). Guide to the geology and tectonic evolution of the southern Coast Mountains. *Geological Survey of Canada.* Open File n. 2490, 77 p.

Monger, J. W. H., Price, R. A. & Tempelman-Kluit, D. J. (1982). Tectonic accretion and the origin of the two major metamorphic and plutonic welts in the Canadian Cordillera. *Geology* **10**(2), 70-75.

Monger, J. W. H., van der Heyden, P., Journeay, J. M., Evenchick, C. E. & Mahoney, J. B. (1994). Jurassic-Cretaceous basins along the Canadian Coast Belt: Their bearing on pre-mid-Cretaceous sinistral displacements. *Geology* **22**(2), 175-178.

Moore, J. C. & Connelly, W. (1977). Mesozoic tectonics of the southern Alaska margin. In: Taiwani, M. & Pitman, W. C. I. (eds.) *Island Arcs, Deep Sea Trenches, and Back-arc Basins*. American Geophysical Union Maurice Ewing Series 1, pp. 71-82.

Moores, E. M. (1998). Ophiolites, the Sierra Nevada, "Cordillera", and the Orogeny along the Pacific and Caribbean margins of North and South America. *International Geology Review* **40**(n. 1), 40-54.

Mortensen, J. K. & Hulbert, L. J. (1991). A U-Pb zircon age for a Maple Creek gabbro sill, Tatamagouche Creek area, southwestern Yukon Territory. *Geological Survey of Canada.* Radiogenic Age and Isotopic Studies: Report 5 Paper 91-2, 175-179 p.

Mortimer, N. (1986). Late Triassic, arc-related, potassic igneous rocks in the North American cordillera. *Geology* **14**, 1035-1038.

Muffler, L. J. P. (1967). Stratigraphy of the Keku Islets and neighboring parts of Kuiu and Kupreanof Islands, southeastern Alaska. *U.S. Geological Survey.* Bulletin 1241-C, 52 p.

Muller, J. E. (1967). Kluane Lake map area, Yukon Territory (115G, 115F/E 1/2). *Geological Survey of Canada.* Memoir 340, 137 p.

Muller, J. E. (1977). Evolution of the Pacific Margin, Vancouver Island, and adjacent regions. *Canadian Journal of Earth Sciences* **14**, 2062-2085.

Muller, J. E. (1977). Geology of Vancouver Island. *Geological Survey of Canada* Open File Map 463.

Muller, J. E. (1977). Metchosin volcanics and Sooke intrusions of southern Vancouver Island. *Report of Activities, Part A; Geological Survey of Canada, Paper 77-1A*, 287-294.

Muller, J. E. (1980). The Paleozoic Sicker Group of Vancouver Island, British Columbia. *Geological Survey of Canada.* Paper 79-30, 22 p.

Muller, J. E. (1981). Insular and Pacific Belts. In: Price, R. A., Monger, J. W. H. & Muller, J. E. (eds.) *Cordilleran Cross-section-Calgary to Victoria, Field Guide 1981*. Geological Association of Canada Field Guide. pp. 261-334.

Muller, J. E., Cameron, B. E. B. & Northcote, K. E. (1981). Geology and mineral deposits of Nootka Sound Map-Area, Vancouver Island, British Columbia. *Geological Survey of Canada.* Paper 80-16.

Muller, J. E., Northcote, K. E. & Carlisle, D. (1974). Geology and mineral deposits of Alert Bay - Cape Scott map area, Vancouver Island, British Columbia. *Geological Survey of Canada.* Paper 74-8, 77 p.

Muller, J. E., P. D. Snavely, J. & Tabor, R. W. (1983). The Tertiary Olympic Terrane, southwest Vancouver Island and northwest Washington. In: *Geological Association of Canada - Mineralogical Association of Canada Annual Meeting, Field Trip Guidebook, Trip 12*. University of Victoria: Victoria, B. C., pp. 59.

Muller, J. E. & Rahmani, R. A. (1970). Upper Triassic sediments of northern Vancouver Island. *Geological Survey of Canada.* Report of Activities, Part B Paper 70-1B, 11-18 p.

Muller, J. E., Wanless, R. K. & Loveridge, W. D. (1974). A Paleozoic zircon age of the Westcoast Crystalline Complex of Vancouver Island, British Columbia. *Canadian Journal of Earth Sciences* **11**, 1717-1722.

Nelson, J. & Mihalynuk, M. (1993). Cache Creek Ocean: Closure or enclosure? *Geology* **21**, 173-176.

Newton, C. R. (1983). Paleozoogeographic affinities of Norian bivalves from the Wrangellian, Peninsular, and Alexander terranes, northwestern North America. In: Stevens, C. H. (ed.) *Pre-Jurassic Rocks in Western North American Suspect Terranes*. Pacific Section, Society of Economic Paleontologists and Mineralogists. pp. 37-48.

Nixon, G. T., Hammack, J. L., Hamilton, J. V. & Jennings, H. (1993). Preliminary geology of the Mahatta Creek area, northern Vancouver Island (92L/5). In: Grant, B. & Newell, J. M. (eds.) *Geological Fieldwork 1992*. B.C. Ministry of Energy, Mines and Petroleum Resources. Paper 1993-1, pp. 17-35.

Nixon, G. T., Hammack, J. L., Hamilton, J. V. & Jennings, H. (1993). Preliminary geology of the Mahatta Creek area, northern Vancouver Island (92L/5). *British Columbia Ministry of Energy, Mines, and Petroleum Resources.* Open File 1993-10, scale 1:50,000.

Nixon, G. T., Hammack, J. L., Koyanagi, V. M., Payie, G. J., Haggart, J. W., Orchard, M. J., Tozer, T., Friedman, R. M., D.A., A., Palfy, J. & Cordey, F. (2006). Geology of the Quatsino – Port McNeill area, northern Vancouver Island. *B.C. Ministry of Energy, Mines and Petroleum Resources.* Geoscience Map 2006-2, scale 1:50 000.

Nixon, G. T., Hammack, J. L., Koyanagi, V. M., Payie, G. J., Panteleyev, A., Massey, N. W. D., Hamilton, J. V. & Haggart, J. W. (1994). Preliminary geology of the Quatsino - Port McNeill map areas, northern Vancouver Island (92L/12, 11). In: Grant, B. & Newell, J. M. (eds.) *Geological Fieldwork 1993*. B.C. Ministry of Energy, Mines and Petroleum Resources. Paper 1994-1, pp. 63-85.

Nixon, G. T., Hammack, J. L., Koyanagi, V. M., Payie, G. J., Panteleyev, A., Massey, N. W. D., Hamilton, J. V. & Haggart, J. W. (1994). Preliminary geology of the Quatsino - Port McNeill map areas, northern Vancouver Island (92L/12, 11). *B.C. Ministry of Energy, Mines, and Petroleum Resources.* Open File 1994-26, scale 1:50,000.

Nixon, G. T., Hammack, J. L., Koyanagi, V. M., Payie, G. J., Snyder, L. D., Panteleyev, A., Massey, N. W. D., Archibald D.A., Haggart, J. W., Orchard, M. J., Friedman, R. M., Tozer, T., Tipper, H. W., Poulton, T. P., Palfy, J., Cordey, F. & Barron, D. J. (2006). Geology of the Holberg - Winter Harbour area, northern Vancouver Island. *B.C. Ministry of Energy, Mines and Petroleum Resources.* Geoscience Map 2006-3, scale 1:50 000.

Nixon, G. T., Hammack, J. L., Payie, G. J., Snyder, L. D., Archibald, D. A. & Barron, D. J. (1995). Quatsino-San Josef map area, Northern Vancouver Island (92L/12W, 102I/8,9). *B.C. Ministry of Energy, Mines and Petroleum Resources.* Open File 1995-9, scale 1:50,000.

Nixon, G. T., Hammack, J. L., Payie, G. J., Snyder, L. D., Archibald, D. A. & Barron, D. J. (1995). Quatsino-San Josef map area, Northern Vancouver Island; geological overview (92L/12W, 102I/8,9). In: Grant, B. & Newell, J. M. (eds.) *Geological Fieldwork 1994*. B.C. Ministry of Energy, Mines and Petroleum Resources. Paper 1995-1, pp. 9-21.

Nixon, G. T., Kelman, M. C., Stevenson, D., Stokes, L. A. & Johnston, K. A. (2006). Preliminary geology of the Nimpkish map area (NTS 092L/07), northern Vancouver Island, British Columbia. In: Grant, B. & Newell, J. M. (eds.) *Geological Fieldwork 2005*. B.C. Ministry of Energy, Mines and Petroleum Resources. Paper 2006-1, pp. 135-152.

Nixon, G. T., Kelman, M. C., Stevenson, D., Stokes, L. A. & Johnston, K. A. (2006). Preliminary geology of the Nimpkish map area, northern Vancouver Island (92L/07). *B.C. Ministry of Energy, Mines and Petroleum Resources.* Open File 2006-5 scale 1:50 000.

Nixon, G. T., Larocque, J., Greene, A. R. & Scoates, J. S. (2008). Stratigraphic setting and metallogenic significance of high-Mg lavas in the Karmutsen flood basalts, northern Vancouver Island, British Columbia. *GAC-MAC 2008*, Quebec City, Quebec.

Nixon, G. T., Laroque, J., Pals, A., Styan, J., Greene, A. R. & Scoates, J. S. (2008). High-Mg lavas in the Karmutsen flood basalts, northern Vancouver Island (NTS 092L): Stratigraphic setting and metallogenic significance. In: Grant, B. (ed.) *Geological Fieldwork 2007*. B.C. Ministry of Energy, Mines and Petroleum Resources Paper 2008-1. pp. 175-190.

Nixon, G. T. & Orr, A. J. (2007). Recent revisions to the Early Mesozoic stratigraphy of Northern Vancouver Island (NTS 102I; 092L) and metallogenic implications, British Columbia. In: Grant, B. (ed.) *Geological Fieldwork 2006*. B.C. Ministry of Energy, Mines and Petroleum Resources Paper 2007-1. pp. 163-177.

Nixon, G. T., Snyder, L. D., Payie, G. J., Long, S., Finnie, A., Friedman, R. M., D.A., A., Orchard, M. J., Tozer, T., Poulton, T. P. & Haggart, J. W. (2006). Geology of the Alice Lake area, northern Vancouver Island. *B.C. Ministry of Energy, Mines and Petroleum Resources.* Geoscience Map 2006-1, scale 1:50 000.

Nokleberg, W. J., Albert, N. R. D., Bond, G. C., Herzon, P. L., Miyaoka, R. T., Nelson, W. H., Richter, D. H., Smith, T. E., Stout, J. H., Yeend, W. & Zehner, R. E. (1982). Geologic map of the southern Mount Hayes Quadrangle, Alaska. *U. S. Geological Survey* Open-File Report 82-52, 1:250,000 scale, 27 p. 1:250,000.

Nokleberg, W. J., Aleinikoff, J. N., Dutro, J. T. J., Lanphere, M. A., Silberling, N. J., Silva, S. R., Smith, T. E. & Turner, D. L. (1992). Map, tables, and summary fossil and isotopic age data, Mount Hayes quadrangle, eastern Alaska Range, Alaska. *U. S. Geological Survey* Miscellaneous Field Studies Map 1996-D, 1:250,000 scale. 1:250,000.

Nokleberg, W. J., Aleinikoff, J. N., Lange, I. M., Silva, S. R., Miyaoka, R. T., Schwab, C. E. & Zehner, R. E. (1992). Preliminary geologic map of the Mount Hayes quadrangle, eastern Alaska Range, Alaska. *U. S. Geological Survey* Open-File Report. 1:250,000.

Nokleberg, W. J., Bundtzen, T. K., Eremin, R. A., Ratkin, V. V., Dawson, K., Shpikerman, V. I., Goryachev, N. A., Byalobzhesky, S. G., Frolov, Y. F., Khanchuk, A. I., Koch, R. D., Monger, J. W. H., Pozdeev, A. I., Rozenblum, I. S., Rodionov, S. M., Parfenov, L. M., Scotese, C. R. & Sidorov, A. A. (2003). Metallogenesis and Tectonics of the Russian Far East, Alaska, and the Canadian Cordillera. *U.S. Geological Survey.* Open File Report 03-434, 406 p. http://geopubs.wr.usgs.gov/open-file/of03-434/.

Nokleberg, W. J., Cox, D. P., Campbell, D. L., Goldfarb, R. J. & Yeend, W. (1999). Mineral resource tract maps, mineral resource tract descriptions with references, and mineral resource database for 37 tracts in South-Central Alaska. U.S. Geological Survey National Mineral Resource Assessment Team, Assessment of Undiscovered Deposits of Gold, Silver, Copper, Lead, and Zinc in the United States: U.S. Geological Survey Circular 1178, 21 p.

Nokleberg, W. J., Foster, H. L. & Aleinikoff, J. N. (1989). Geology of the northern Copper River Basin, eastern Alaska Range, and southern Yukon-Tanana Basin, southern and east-central Alaska. In: Nokleberg, W. J. & Fisher, M. A. (eds.) *Alaskan geological and geophysical transect*. International Geological Congress, 27th, Guidebook T104. pp. 34-64.

Nokleberg, W. J., Jones, D. L. & Silberling, N. J. (1985). Origin and tectonic evolution of the Maclaren and Wrangellia terranes, eastern Alaska Range, Alaska. *Geological Society of America Bulletin* **96**, 1251-1270.

Nokleberg, W. J., Moll-Stalcup, E. J., Miller, T. P., Brew, D. A., Grantz, A., Reed, J. C., Jr., Plafker, G., Moore, T. E., Silva, S. R. & Patton, W. W., Jr. (1994). Tectonostratigraphic terrane and overlap assemblage map of Alaska. *U.S. Geological Survey* Open-File Report 94-194. scale 1:2,500,000, 1 sheet.

Nokleberg, W. J., Parfenov, L. M., Monger, J. W. H., Baranov, B. V., Byalobzhesky, S. G., Bundtzen, T. K., Feeney, T. D., Fujita, K., Gordey, S. P., Grantz, A., Khanchuk, A. I., Natal'in, B. A., Natapov, L. M., Norton, I. O., Patton, W. W. J., Plafker, G., Scholl, D. W., Sokolov, S. D., Sosunov, G. M., Stone, D. B., Tabor, R. W., Tsukanov, N. V., Vallier, T. & Wakita, K. (1994). Circum-North Pacific tectonostratigraphic terrane map. *U. S. Geological Survey.* Open-File Report 94-0714.

Nokleberg, W. J., Parfenov, L. M., Monger, J. W. H., Norton, I. O., Khanchuk, A. I., Stone, D. B., Scholl, D. W. & Fujita, K. (2000). Phanerozoic tectonic evolution of the Circum-North Pacific. *U. S. Geological Survey.* Professional Paper 1626, 122 p. http://geopubs.wr.usgs.gov/prof-paper/pp1626/.

Nokleberg, W. J., Plafker, G. & Lull, J. S. (1989). Structural analysis of the southern Peninsular, southern Wrangellia, and northern Chugach terranes along the trans-Alaska crustal transect, northern Chugach Mountains, Alaska. *Journal of Geophysical Research* **94**(B4), 4297-4320.

Nokleberg, W. J., Plafker, G. & Wilson, F. H. (1994). Geology of south-central Alaska. In: Plafker, G. & Berg, H. C. (eds.) *The Geology of North America*. Geological Society of America: Boulder, CO. The Geology of Alaska G-1, pp. 311-366.

Northcote, K. E. & Muller, J. E. (1972). Volcanism, plutonism, and mineralization: Vancouver Island. *CIM Bulletin* **65**(726), 49-57.

Page, R. A., Plafker, G., Fuis, G. S., Nokleberg, W. J., Ambros, E. L., Mooney, W. D. & Campbell, D. L. (1986). Accretion and subduction tectonics in the Chugach Mountains and Copper River basin, Alaska: Initial results of the Trans-Alaska Crustal Transect. *Geology* **14**, 501-505.

Panuska, B. C. (1985). Paleomagnetic evidence for a post-Cretaceous accretion for Wrangellia. *Geology* **13**, 880-883.

Panuska, B. C. (1990). An overlooked, world class Triassic flood basalt event. *Geological Society of America Abstracts with Programs* **22**(7), A168.

Panuska, B. C. & Stone, D. B. (1981). Late Paleozoic paleomagnetic data for Wrangellia: Resolution of the polarity ambiguity. *Nature* **283**, 561-563.

Panuska, B. C. & Stone, D. B. (1985). Latitudinal motion of the Wrangellia and Alexander Terranes and the Southern Alaska Superterrane. In: Howell, D. G. (ed.) *AAPG. Earth Science Seminars #1*. pp. 109-120.

Parrish, R. R. & McNicoll, V. J. (1992). U-Pb age determinations from the southern Vancouver Island area, British Columbia. *Geological Survey of Canada.* Radiogenic Age and Isotopic Studies: Report 5 Paper 91-2, 79-86 p.

Patchett, P. J. & Gehrels, G. E. (1998). Continental influence on Canadian cordilleran terranes from Nd isotopic study, and significance for crustal growth processes. *Journal of Geology* **106**, 269-280.

Patchett, P. J., Gehrels, G. E. & Isachsen, C. E. (1998). Nd isotopic characteristics of metamorphic and plutonic rocks of the Coast Mountains near Prince Rupert, British Columbia. *Canadian Journal of Earth Sciences* **35**, 556-561.

Patton, W. W. J., Box, S. E., Moll-Stalcup, E. J. & Miller, T. P. (1989). Geology of west-central Alaska. *U. S. Geological Survey.* Open-File Report 89-554, 53 p.

Paulay, G. (1992). Comment and Reply on "Galápagos Islands: A Holocene analogue to the Wallowa accreted terrane, western North America. *Geology* **20**(9), 863.

Pavlis, T. L. (1982). Origin and age of the Border Ranges fault of southern Alaska and its bearing on the Late Mesozoic tectonic evolution of Alaska. *Tectonics* **1**(no. 4), 343-368.

Pavlis, T. L. & Sisson, V. B. (1995). Structural history of the Chugach metamorphic complex in the Tana River region, eastern Alaska: A record of Eocene ridge subduction. *GSA Bulletin* **107**(11), 1333-1355.

Petocz, R. G. (1970). Biostratigraphy of Lower Permian Fusilinidae of the Upper Delta River area, East-central Alaska Range. *Geological Society of America.* Special Paper 130.

Plafker, G. & Berg, H. C. (1994). Overview of the geology and tectonic evolution of Alaska. In: G., P. & H.C., B. (eds.) *The Geology of North America*. Geological Society of America: Boulder, CO. The Geology of Alaska G-1, pp. 989-1021.

Plafker, G., Blome, C. D. & Silberling, N. J. (1989). Reinterpretation of lower Mesozoic rocks on the Chilkat Peninsula, Alaska, as a displaced fragment of Wrangellia. *Geology* **17**, 3-6.

Plafker, G. & Hudson, T. (1980). Regional implications of the Upper Triassic metavolcanic and metasedimentary rocks on the Chilkat Peninsula, southeastern Alaska. *Canadian Journal of Earth Sciences* **17**(6), 681-689.

Plafker, G., Jones, D. L., Hudson, T. & Berg, H. C. (1976). The Border Ranges fault system in the Saint Elias Mountains and Alexander Archipelago. *U.S. Geological Survey.* U. S. Geological Survey in Alaska: Accomplishments during 1975 751-B, B41-43 p.

Plafker, G., Moore, J. C. & Winkler, G. R. (1994). Geology of the southern Alaska margin. In: Plafker, G. & Berg, H. C. (eds.) *The Geology of North America*. Geological Society of America: Boulder, CO. The Geology of Alaska G-1, pp. 389-449.

Plafker, G., Nokleberg, W. J. & Lull, J. S. (1989). Bedrock geology and tectonic evolution of the Wrangellia, Peninsular, and Chugach terranes along the Trans-Alaskan Crustal Transect in the northern Chugach Mountains and southern Copper River basin, Alaska. *Journal of Geophysical Research* **94**, 4,255-4,295.

Prichard, R. A. (2003). Project report of the airborne geophysical survey for the southern Delta River area, east-central Alaska. *Alaska Division of Geological and Geophysical Surveys* Geophysical Report 2003-7, 2 sheets, scale 1:63,360, 252 p.

Read, P. B. & Monger, J. W. H. (1976). Pre-Cenozoic volcanic assemblages of the Kluane and Alsek Ranges, southwestern Yukon Territory. *Geological Survey of Canada.* Open-File Report 381, 96 p.

Reed, B. L. & Lanphere, M. A. (1973). Alaska-Aleutian Range batholith: Geochronology, chemistry, and relation to circum-Pacific plutonism. *Geological Society of America Bulletin* **84**, 2583-2610.

Reed, B. L., Miesch, A. T. & Lanphere, M. A. (1983). Plutonic rocks of Jurassic age in the Alaska-Aleutian Range batholith: Chemical variations and polarity. *Geological Society of America Bulletin* **94**, 1232-1240.

Richards, M. A., Jones, D. L., Duncan, R. A. & DePaolo, D. J. (1991). A mantle plume initiation model for the Wrangellia flood basalt and other oceanic plateaus. *Science* **254**, 263-267.

Richter, D. H. (1971). Geologic map of the Nabesna A-3 quadrangle, Alaska. *U. S. Geological Survey.* Miscellaneous Geologic Investigations Map I-655, scale 1:63,360.

Richter, D. H. (1971). Geologic map of the Nabesna B-4 quadrangle, Alaska. *U. S. Geological Survey.* Miscellaneous Geologic Investigations Map I-656, scale 1:63,360.

Richter, D. H. (1971). Reconnaissance geologic map and section of the Nabesna A-3 quadrangle, Alaska. *U. S. Geological Survey* Miscellaneous Investigations 655. scale 1:63,360, 1 sheet.

Richter, D. H. (1973). Geologic map of the Nabesna A-4 quadrangle, Alaska. *U. S. Geological Survey.* Miscellaneous Geologic Investigations Map I-789, scale 1:63,360.

Richter, D. H. (1976). Geologic map of the Nabesna Quadrangle, Alaska. *U. S. Geological Survey.* Miscellaneous Geologic Investigations Map I-932, scale 1:250,000.

Richter, D. H., Albert, N. R. D., Barnes, D. F., Griscom, A., Marsh, S. P. & Singer, D. A. (1975). The Alaska Mineral Resource Assessment Program; background information to accompany folio of geologic and mineral resource maps of the Nabesna Quadrangle, Alaska. *U.S. Geological Survey Circular.* The Alaska Mineral Resource Assessment Program; background information to accompany folio of geologic and mineral resource maps of the Nabesna Quadrangle, Alaska 718, 6 p.

Richter, D. H. & Jones, D. L. (1973). Structure and stratigraphy of the eastern Alaska Range, Alaska. In: *Arctic Geology*. American Association of Petroleum Geologists. 19, pp. 408-420.

Richter, D. H., Lanphere, M. A. & Matson, N. A. J. (1975). Granitic plutonism and metamorphism, eastern Alaska Range. *Geological Society of America Bulletin* **86**, 819-829.

Richter, D. H. & Schmoll, H. R. (1973). Geologic map of the Nabesna C-5 quadrangle, Alaska. *U. S. Geological Survey.* Map GQ-1062, scale 1:63,360.

Richter, D. H., Sharp, W. N., Dutro, J. T. J. & Hamilton, W. B. (1977). Geologic map of parts of the Mount Hayes A-1 and A-2 quadrangles, Alaska. *U. S. Geological Survey* Miscellaneous Investigations Series Map. scale 1:63,360.

Richter, D. H., Smith, J. G., Lanphere, M. A., Dalrymphe, G. B., Reed, B. L. & Shew, N. (1990). Age and progression of volcanism, Wrangell volcanic field, Alaska. *Bulletin of Volcanology* **53**, 29-44.

Ricketts, B. D., Evenchick, C. A., Anderson, R. G. & Murphy, D. C. (1992). Bowser basin, northern British Columbia: Constraints on the timing of initial subsidence and Stikinia-North America terrane interactions. *Geology* **20**, 1119-1122.

Ridgway, K. D., Trop, J. M., Nokleberg, W. J., Davidson, C. M. & Eastham, K. R. (2002). Mesozoic and Cenozoic tectonics of the eastern and central Alaska Range: Progressive basin development and deformation in a suture zone. *Geological Society of America Bulletin* **114**, 1,480-1,504.

Roback, R. C., Sevigny, J. H. & Walker, N. W. (1994). Tectonic setting of the Slide Mountain terrane, southern British Columbia. *Tectonics* **13**(5), 1242-1258.

Roback, R. C. & Walker, N. W. (1995). Provenance, detrital zircon U-Pb geochronometry, and tectonic significance of Permian to Lower Triassic sandstone in southeastern Quesnellia, British Columbia and Washington. *GSA Bulletin* **107**(6), 665-675.

Roeske, S. M., Mattinson, J. M. & Armstrong, R. L. (1989). Isotopic ages of glaucophane schists on the Kodiak Islands, southern Alaska, and their implications for the Mesozoic tectonic history of the Border Ranges fault system. *Geological Society of America Bulletin* **101**, 1021-1037.

Roeske, S. M., Pavlis, T. L., Snee, L. W. & Sisson, V. B. (1992). 40Ar/39Ar isotopic Ages from the Combined Wrangellia-Alexander Terrane along the Border Ranges Fault System in the Eastern Chugach Mountains and Glacier Bay, Alaska. *USGS.* US Geological Survey Bulletin 1999, 180-195 p.

Roeske, S. M., Snee, L. W. & Pavlis, T. L. (2003). Dextral-slip reactivation of an arc-forearc boundary during Late Cretaceous-Early Eocene oblique convergence in the northern Cordillera. In: Sisson, V. B., Roeske, S. M. & Pavlis, T. L. (eds.) *Geology of a Transpressional Orogen Developed During Ridge-Trench Interaction Along the North Pacific Margin*. Geological Society of America: Boulder, Colorado. 371, pp. 141-169.

Rohr, K. M. M. & Currie, L. (1997). Queen Charlotte basin and Coast Mountains: paired belts of subsidence and uplift caused by a low-angle normal fault. *Geology* **25**(9), 819-822.

Rose, A. W. (1965). Geology and mineral deposits of the Rainy Creek area, Mt. Hayes Quadrangle, Alaska. *Alaska Division of Mines and Minerals.* Geologic Report 14, 51 p. http://www.dggs.dnr.state.ak.us/scan1/gr/text/GR14.PDF.

Rose, A. W. (1966). Geological and geochemical investigations in the Eureka Creek and Rainy Creek areas, Mt. Hayes Quadrangle, Alaska. *Alaska Division of Mines and Minerals.* Geologic Report 20, 41 p. http://www.dggs.dnr.state.ak.us/scan1/gr/text/GR20.PDF.

Rose, A. W. (1966). Geology of part of the Amphitheatre Mountains, Mt. Hayes Quadrangle, Alaska. *Alaska Division of Mines and Minerals.* Geologic Report 19, 17 p. http://www.dggs.dnr.state.ak.us/scan1/gr/text/GR19.PDF.

Rose, A. W. & Saunders, R. H. (1965). Geology and geochemical investigations near Paxson, northern Copper River basin, Alaska. *Alaska Division of Mines and Minerals.* Geologic Report 13, 38 p. http://www.dggs.dnr.state.ak.us/scan1/gr/text/GR13.PDF.

Ross, K. V., Friedman, R. M., Dawson, K. M. & Leitch, C. H. B. (1996). U-Pb zircon ages of the Island Copper deposit intrusions, northern Vancouver Island, British Columbia. *Geological Survey of Canada.* Current Research 1996-A, 111-117 p.

Rubin, C. M. & Saleeby, J. B. (1991). The Gravina sequence: Remenants of a mid-Mesozoic arc in southern southeast Alaska. *Journal of Geophysical Research* **96**, 14,551-14,568.

Rubin, C. M. & Saleeby, J. B. (1992). Tectonic history of the eastern edge of the Alexander terrane, southeast Alaska. *Tectonics* **11**, 586-602.

Rubin, C. M. & Saleeby, J. B. (2000). U-Pb geochronology of mid-Cretaeous and Tertiary plutons along the western edge of the Coast Mountains, Revillagigedo Isalnd and Portland Peninsula, southeast Alaska. In: Stowell, H. H. & McClelland, W. C. (eds.) *Tectonics of the Coast Mountains, Southeastern Alaska and British Columbia*. Geological society of America Boulder, Colorado. Special Paper 343, pp. 145-158.

Saleeby, J. B. (1983). Accretionary tectonics of the North American cordillera. *Annual Review of Earth and Planetary Sciences* **15**, 45-73.

Saleeby, J. B. (1992). Age and tectonic setting of the Duke Island ultramafic intrusion, southeast Alaska. *Canadian Journal of Earth Sciences* **29**, 506-522.

Saleeby, J. B. (2000). Geochronologic investigations along the Alexander-Taku terrane boundary, southern Revillagigedo Island to Cape Fox areas, southeast Alaska. In: Stowell, H. H. & McClelland, W. C. (eds.) *Tectonics of the Coast Mountains, Southeastern Alaska and British Columbia*. Geological Society of America. Special Paper 343, pp. 107-143.

Saleeby, J. B., Gehrels, G. E., Eberlein, G. D. & Berg, H. C. (eds.) (1984). *Progress in lead/uranium zircon studies of Lower Paleozoic rocks of the southern Alexander terrane*. U.S. Geological Survey The U. S. Geological Survey in Alaska: Accomplishments during 1981 Circular 868. 110-113 pp.

Saleeby, J. B., Goodin, S. E., Sharp, W. D. & Busby, C. J. (1978). Early Mesozoic paleotectonic-paleogeographic reconstruction of the southern Sierra Nevada region. In: Howell, D. G. & McDougall, K. A. (eds.) *Mesozoic Paleogeography of the Western United States*. pp. 311-336.

Saltus, R. W., Hudson, T. & Wilson, F. H. (2007). The geophysical character of southern Alaska: Implications for crustal evolution. In: Ridgeway, K. D., Trop, J. M., O'Neill, J. M. & Glen, J. M. G. (eds.) *Tectonic Growth of a Collisional Continental Margin: Crustal Evolution of Southern Alaska*. Geological Society of America Special Paper 431, pp. 1-20.

Samson, S. D., McClelland, W. C., Patchett, P. J., Gehrels, G. E. & Anderson, R. G. (1989). Evidence from neodymium isotopes for mantle contributions to Phanerzoic crustal genesis in the Canadian Cordillera. *Nature* **337**, 705-709.

Samson, S. D., Patchett, J., McClelland, W. C. & Gehrels, G. E. (1991). Nd isotopic characterization of metamorphic rocks in the Coast Mountains, Alaskan and Canadian Cordillera; ancient crust bounded by juvenile terranes. *Tectonics* **10**, 770-780.

Samson, S. D., Patchett, P. J., Gehrels, G. E. & Anderson, R. G. (1990). Nd and Sr isotopic characterization of the Wrangellia terrane and implications for crustal growth of the Canadian cordillera. *Journal of Geology* **98**, 749-762.

Sangster, D. (1961). Contact metasomatic magnetite deposits of southwestern B.C. Ph.D., University of British Columbia, 256 pp.

Sarewitz, D. (1983). Sevin Devils terrane: Is it really a piece of Wrangellia? *Geology* **11**, 634-637.

Scheffler, J. M. (1983). A petrologic and tectonic comparison of the Hell's Canyon area, Oregon-Idaho, and Vancouver Island, British Columbia. M.Sc., Washington State University, 98 pp.

Schmidt, J. M., O'Neill, J. M., Snee, L. W., Blodgett, R. B., Ridgeway, K. D., Wardlaw, B. R. & Blome, C. D. (2003). The Northwestern edge of Wrangellia: Stratigraphic and intrusive links between crustal block from the Peninsular Terrane to Broad Pass *Geological Society of America Cordilleran Section*, Volume 35, No. 6, p. 560.

Schmidt, J. M. & Rogers, R. K. (2007). Metallogeny of the Nikolai large igneous province (LIP) in southern Alaska and its influence on the mineral potential of the Talkeetna Mountains. In: Ridgway, K. D., Trop, J. M., O’Neill, J. M. & Glen, J. M. G. (eds.) *Tectonic Growth of a Collisional Continental Margin: Crustal Evolution of Southern Alaska*. Geological Society of America Special Paper 431, pp. 623-648.

Schmidt, J. M., Werdon, M. B. & Wardlaw, B. (2003). New mapping near Iron Creek, Talkeetna Mountains, indicates presence of Nikolai greenstone. In: Clautice, K. H. & Davis, P. K. (eds.) *Short Notes on Alaska Geology 2003*. Alaska Division of Geological & Geophysical Surveys Professional Report 120J, pp. 101-108.

Scholl, D. W., Vallier, T. L. & Stevenson, A. J. (1986). Terrane accretion, production, and continental growth: A perspective based on the origin and tectonic fate of the Aleutian-Bering Sea region. *Geology* **14**, 43-47.

Schröder-Adams, C. & Haggart, J. W. (2006). Biogeography of Foraminifera in tectonic reconstructions: Limitations and constraints on the paleogeographic position of Wrangellia. In: Haggart, J. W., Enkin, R. J. & Monger, J. W. H. (eds.) *Paleogeography of the North American Cordillera: Evidence For and Against Large-Scale Displacements*. Geological Association of Canada. Special Paper 46, pp. 95-108.

Schwartz, E. J., Muller, J. E. & Clark, K. R. (1980). Paleomagnetism of the Karmutsen Basalts from southeast Vancouver Island. *Canadian Journal of Earth Sciences* **17**(n. 3), 389-399.

Scoates, J. S., Greene, A. R. & Weis, D. (2006). Platinum group element geochemistry of the Karmutsen flood basalt province, Wrangellia terrane, Vancouver Island. *Geological Society of America Cordilleran Section*, Anchorage, Alaska. 38: 5, p. 26.

Scoates, J. S., Greene, A. R. & Weis, D. (2008). Platinum group element geochemistry of large igneous provinces. *Goldschmidt 2008 Conference*, Vancouver, BC.

Scoates, J. S., Greene, A. R., Weis, D., Israel, S. & Nixon, G. T. (2007). PGE geochemistry and sulphide saturation state of the Triassic Wrangellia basalts, Vancouver Island and Yukon. *Cordilleran Mineral Roundup Expo*, Vancouver, BC

Scotese, C. R., Nokleberg, W. J., Monger, J. W. H., Norton, I. O., L.M., P., Bundtzen, T. K., Dawson, K. M., Frolov, E., Fujita, Y. F., Kazuya, R. A., Goryachev, N. A., Khanchuk, A. I., Pozdeev, A. I., Ratkin, V. V., Rodionov, S. M., Rozenblum, I. S., Shpikerman, V. I., Sidorov, A. A. & Stone, D. B. (2001). Dynamic computer model for the metallogenesis and tectonics of the Circum-North Pacific. *in Nokleberg, W..J. and Diggles, M.F., eds., : U. S. Geological Survey.* Open-File Report 01-261 http://geopubs.wr.usgs.gov/prof-paper/pp1626/.

Selwyn, A. R. C. (1872). Preliminary explorations in British Columbia. *Geological Survey of Canada.* Report of Progress 1871-1872, 52-63 p.

Sharp, R. P. (1943). Geology of the Wolf Creek area, St. Elias Range, Yukon Territory, Canada. . *Geological Society of America Bulletin* **54**, 625-650.

Sherwood, M. B. (1965). *Exploration of Alaska, 1865-1900*.Yale Western American Series, vol. VII. Yale University Press: New Haven, Connecticut, 207 p.

Silberling, N. J., Grant-Mackie, J. A. & Nichols, K. M. (1997). The Late Triassic bivalve Monotis in accreted terranes of Alaska. *USGS.* Bulletin 2151, 27 p.

Silberling, N. J., Richter, D. H., Jones, D. L. & Coney, P. C. (1981). Geologic map of the bedrock part of the Healy A-1 Quadrangle south of the Talkeetna-Broxon Gulch fault system, Clearwater Mountains, Alaska. *U. S. Geological Survey* Open-File Report 81-1288. 1:63,360 scale, 1 sheet.

Silberman, M. L., MacKevett, E. M., Jr., Connor, C. L., Klock, P. R. & Kalechitz, G. (1981). K-Ar ages of the Nikolai greenstone from the McCarthy Quadrangle, Alaska- the 'docking' of Wrangellia. *The United States Geological Survey in Alaska: Accomplishments during 1979: U. S. Geological Survey.* Circular 823-B, B61-B63 p.

Silberman, M. L., MacKevett, E. M., Jr., Connor, C. L. & Matthews, A. (1980). Metallogenic and tectonic significance of oxygen isotope data and whole-rock potassium-argon ages of the Nikolai Greenstone, McCarthy quadrangle, Alaska. *U. S. Geological Survey.* Open-File Report 80-2019, 29 p.

Sinclair, A. J., Bentzen, A. & McLeod, J. A. (1979). Geology of the White River Native Copper Deposits, Yukon (115F). *Yukon Geological Survey.* Geology of the White River Native Copper Deposits, Yukon (115F), 27 p.

Sisson, V. B. & Pavlis, T. L. (1993). Geologic consequences of plate reorganization: An example from the Eocene southern Alaska forearc. *Geology* **21**, 913-916.

Sluggett, C. L. (2003). Uranium-lead age and geochemical constraints on Paleozoic and Early Mesozoic magmatism in Wrangellia Terrane, Saltspring Island, British Columbia. Unpublished B.Sc. thesis, University of British Columbia, 84 pp.

Smith, J. G. & MacKevett, E. M., Jr. (1970). The Skolai Group in the McCarthy B-4, C-4, C-5 Quadrangles, Wrangell Mountains, Alaska. *U. S. Geological Survey.* Bulletin 1274-Q, Q1-Q26 p.

Smith, P. L. (2006). Paleobiogeography and Early Jurassic molluscs in the context of terrane displacement in western Canada. In: Haggart, J. W., Enkin, R. J. & Monger, J. W. H. (eds.) *Paleogeography of the North American Cordillera: Evidence For and Against Large-Scale Displacements*. Geological Association of Canada. Special Paper 46, pp. 81-94.

Smith, T. E. (1971). Geology, economic geochemistry, and placer gold resources of the western Clearwater Mountains, east-central Alaska. Ph.D., University of Nevada.

Smith, T. E. (1973). Geologic map of the western Clearwater Mountains. *Alaska Division of Geological & Geophysical Surveys* Alaska Open-File Report 29, 7 p., 1 sheet, scale 1:63,360.

Smith, T. E. (1974). Regional geology of the Susitna-Maclaren River area, central Alaska. *Alaska Division of Geologic and Geophysical Surveys.* Annual Reptort 1973, 3-6 p.

Smith, T. E. (1981). Geology of the Clearwater Mountains, south-central Alaska. *Alaska Division of Geological and Geophysical Surveys.* Geologic Report 60, 72 p. http://www.dggs.dnr.state.ak.us/scan2/gr/text/GR60.PDF.

Stamatakos, J. A., Trop, J. T. & Ridgeway, K. D. (2001). Late Cretaceous paleogeography of Wrangellia: Paleomagnetism of the MacColl Ridge Formation, southern Alaska, revisited. *Geology* **29**, 947-950.

Stanley, G. D., Jr. & Vallier, T. L. (1992). Comment and reply on "Galápagos Islands: A Holocene analogue to the Wallowa accreted terrane, western North America. *Geology* **20**, 661-662.

Starkey, R. J. & Frost, B. R. (1990). Low-grade metamorphism of the Karmutsen Volcanics, Vancouver Island, British Columbia. *Journal of Petrology* **31**(1), 167-195.

Stevens, D. L. (1971). Geology and geochemistry of the Denali prospect, Clearwater Mountauns, Alaska. PhD, University of Alaska, 81 pp.

Stevenson, J. S. (1945). Geology and ore deposits of the China Creek area, Vancouver Island, British Columbia. *British Columbia Ministry of Energy, Mines, and Petroleum Resources.* Annual Report, 1944, 5-26 p.

Stone, D. B., Panuska, B. C. & Packer, D. R. (1982). Paleolatitudes versus time for southern Alaska. *Journal of Geophysical Research* **87**, 3697-3707.

Stone, D. B. & Wallace, W. K. (1987). A geological framework of Alaska. *Episodes* **10**(no. 4), 283-289.

Stout, J. H. (1965). Bedrock geology between Rainy Creek and the Denali Fault, eastern Alaska Range, Alaska. MS, University of Alaska, 75 pp.

Stout, J. H. (1976). Geology of the Eureka Creek area, east-central Alaska Range. *Alaska Division of Geological and Geophysical Surveys.* Geologic Report 46, 32 p. http://www.dggs.dnr.state.ak.us/scan1/gr/text/GR46.PDF.

Surdam, R. C. (1968). Origin of native copper and hematite in the Karmutsen Group, Vanouver Island, British Columbia. *Economic Geology* **63**, 961-966.

Surdam, R. C. (1968). The stratigraphy and volcanic history of the Karmutsen group, Vancouver Island, British Columbia. *University of Wyoming, Contributions to Geology* **7**, 15-26.

Surdam, R. C. (1969). Electron microprobe study of prehnite and pumpellyite from the Karmutsen Group, Vanouver Island, British Columbia. *American Mineralogist* **54**, 256-266.

Surdam, R. C. (1970). The petrology and chemistry of the Karmutsen group volcanic rocks. *University of Wyoming, Contributions to Geology* **9**(1), 9-12.

Sutherland Brown, A. (1968). Geology of the Queen Charlotte Islands, British Columbia. *BC Department of Mines and Petroleum Resources, Bulletin* **54**, 226 p.

Sutherland Brown, A. & Yorath, C. J. (1985). Lithoprobe profile across southern Vancouver Island: Geology and Tectonics. In: Tempelman-Kluit, D. (ed.) *Field Guides to Geology and Mineral Deposits in the Southern Canadian Cordillera*. Geological Soceitry of America Cordilleran section annual meeting, Field Trip Guidebook 8: Vancouver, British Columbia. pp. 8.1-8.23.

Sutherland-Brown, A., Yorath, C. J., Anderson, R. G. & Dom, K. (1986). Geological maps of southern Vancouver Island, LITHOPROBE I 92C/10, 11, 14, 16, 92F/1, 2, 7, 8. *Geological Survey of Canada* Open File 1272.

Symons, D. T. A. (1971). Paleomagnetic notes on the Karmutsen basalts, Vancouver Island, British Columbia. *Geological Survey of Canada.* Paper 71-24, 10-24 p.

Symons, D. T. A. (1984). Paleomagnetism of the Westcoast Complex and the geotectonics of the Vancouver Island segment of the Wrangellia subterrane. *Journal of Geodynamics* **2**, 211-228.

Terabayashi, M. (1993). Compositional evolution in Ca-amphibole in the Karmutsen metabasites, Vancouver Island, British Columbia, Canada. *Journal of Metamorphic Petrology* **11**(5), 677-690.

Thompson, R. I. (1988). Late Triassic through Cretaceous geological evolution, Queen Charlotte Islands, British Columbia. In: *Current Research, part E*. Geological Survey of Canada, Paper 88-1E. pp.

Thompson, R. I., Haggart, J. W. & Lewis, P. D. (1991). Late Triassic through early Tertiary evolution of the Queen Charlotte Islands: a perspective on hydrocarbon potential. In: Woodsworth, G. J. (ed.) *Evolution and Hydrocarbon Potential of the Queen Charlotte Basin, British Columbia*. Geological Survey of Canada, Paper 90-10. pp.

Thompson, T. B., Pierson, J. R. & Lyttle, T. (1982). Petrology and petrogenesis of the Bokan Mountain Granite Complex, southeastern Alaska. *Geological Society of America Bulletin* **93**, 898-908.

Thorkelson, D. J. & Smith, A. D. (1989). Arc and intraplate volcanism in the Spences Bridge Group: Implications for Cretaceous tectonics in the Canadian Cordillera. *Geology* **17**, 1093-1096.

Tipper, H. W. (1984). The allochthonous Jurassic-Lower Cretaceous terranes of the Canadian Cordillera and their relation to correlative strata of the North American craton. *Geological Association of Canada, Special Paper 27*, 113-120.

Tozer, E. T. (1982). Middle Triassic faunas of North America; Their significance for assessing plate and terrane movements. *Geologische Rundschau* **71**, 1077-1104.

Trop, J., Szuch, D. A., Rioux, M. E. & Blodgett, R. B. (2005). Sedimentology and provenance of the Upper Jurassic Naknek Formation, Talkeetna Mountains, Alaska: Bearings on the accretionary tectonic history of the Wrangellia composite terrane. *Geological Society of America Bulletin* **117**(5/6), 570-588, doi:10.1130/B25575.1.

Trop, J. M. & Ridgway, K. D. (2007). Mesozoic and Cenozoic tectonic growth of southern Alaska: A sedimentary basin perspective. In: Ridgway, K. D., Trop, J. M., O'Neill, J. M. & Glen, J. M. G. (eds.) *Tectonic Growth of a Collisional Continental Margin: Crustal Evolution of Southern Alaska*. Geological Society of America Special Paper 431, pp. 55-94.

Trop, J. M., Ridgway, K. D., Manuszak, J. D. & Layer, P. W. (2002). Mesozoic sedimentary-basin development on the allochthonous Wrangellia composite terrane, Wrangell Mountains basin, Alaska: A long-term record of terrane migration and arc construction. *Geological Society of America Bulletin* **114**, 693-717.

Turner, D. L., Herreid, G. & Bundtzen, T. K. (1977). Geochronology of southern Prince of Wales Island, Alaska. *Alaska Division of Geological and Geophysical Surveys Report 55, p. 11-16.* Short notes on Alaska Geology 55, 11-16 p.

Turner, D. L. & Smith, T. E. (1974). Geochronology and generalized geology of the central Alaska Range, Clearwater Mountains and northern Talkeetna Mountains. *Alaska Division of Geological and Geophysical Surveys.* Open-File Report AOF-72, 10 p. http://www.dggs.dnr.state.ak.us/scan1/aof/text/AOF072.PDF.

Umhoefer, P. J. (1990). Stratigraphy and tectonic setting of the upper part of the Cadwallader terrane, southwestern British Columbia. *Canadian Journal of Earth Sciences* **27**, 702-711.

Umhoefer, P. J. (2003). A model for the North America Cordillera in the Early Cretaceous: Tectonic escape related to arc collision of the Guerrero terrane and a change in North America plate motion. In: Johnson, S. E., Paterson, S. R., Fletcher, J. M., Girty, G. H., Kimbrough, D. L. & Martín-Barajas, A. (eds.) *Tectonic Evolution of Northwestern México and the Southwestern USA*. Geological Society of America: Boulder, Colorado. Special Paper 374, pp. 117-134.

Umhoefer, P. J. & Blakey, R. C. (2006). Moderate (1600 km) northward translation of Baja British Columbia from southern California: An attempt at reconcilation of paleomagnetism and geology. In: Haggart, J. W., Enkin, R. J. & Monger, J. W. H. (eds.) *Paleogeography of the North American Cordillera: Evidence For and Against Large-Scale Displacements*. Geological Association of Canada. Special Paper 46, pp. 307-329.

Umhoefer, P. J. & Dorsey, R. J. (1997). Translational terranes: Lessons from central Baja California, Mexico. *Geology* **25**(11), 1007-1010.

van der Heyden, P. (1992). A middle Jurassic to early Tertiary Andean-Sierran arc model for the coast belt of British Columbia. *Tectonics* **11**(1), 82-97.

Wallace, W. K., Hanks, C. L. & Rogers, J. F. (1989). The southern Kahiltna terrane: Implications for the tectonic evolution of southwestern Alaska. *Geological Society of America Bulletin* **101**, 1389-1407.

Ward, P. D., Hurado, J. M., Kirshvink, J. L. & Verosub, K. L. (1997). Measurements of the Cretaceous Paleolatitude of Vancouver Island: Consistent with the Baja-British Columbia Hypothesis. *Science* **277**, 1642-1645.

Werdon, M. B., Riehle, J. R., Schmidt, J. M., Newberry, R. J. & Pessel, G. H. (2000). Major oxide, minor oxide, trace element, and geochemical data from rocks collected in the Iron Creek area, Talkeetna Mountains B-5 Quadrangle. *Alaska Division of Geological & Geophysical Surveys.* Raw Data File 2000-2, 2 sheets, scale 1:63,360, 31 p.

Werdon, M. B., Riehle, J. R., Schmidt, J. M., Newberry, R. J. & Pessel, G. H. (2000). Preliminary geologic map of the Iron Creek area, Talkeetna Mountains B-5 Quadrangle, Alaska. *Alaska Division of Geological & Geophysical Surveys* Preliminary Interpretive Report 2000-7. scale 1:63,360, 1 sheet.

Werdon, M. B., Riehle, J. R., Schmidt, J. M., Newberry, R. J. & Pessel, G. H. (2002). Geologic map of the Iron Creek area, Talkeetna Mountains B-5 Quadrangle, Alaska. *Alaska Division of Geological & Geophysical Surveys* Preliminary Interpretive Report 2002-4, 1 sheet, scale 1:63,360.

Wheeler, J. O., Brookfield, A. J., Gabrielese, H., Monger, J. W. H., Tipper, H. W. & Woodsworth, G. J. (1991). Terrane map of the Canadian Cordillera. *Geological Survey of Canada* Map 1713. scale 1:1 000 000.

Wheeler, J. O. & McFeely, P. (1991). Tectonic assemblage map of the Canadian Cordillera and adjacent part of the United States of America. *Geological Survey of Canada* Map 1712A. scale 1:1 000 000.

White, J. D. L., White, D. L., Vallier, T., G. D. Stanley, J. & Ash, S. R. (1992). Middle Jurassic strata link Wallowa, Olds Ferry, and Izee terranes in the accreted Blue Mountains island arc, northeastern Oregon. *Geology* **20**, 729-732.

Wilson, F. H., Dover, J. D., Bradley, D. C., Weber, F. R., Bundtzen, T. K. & Haeussler, P. J. (1998). Geologic map of Central (Interior) Alaska. *U. S. Geological Survey* Open-File Report 98-133-A, http://wrgis.wr.usgs.gov/open-file/of98-133-a/.

Wilson, F. H., Labay, K. A., Shew, N. B., Preller, C. C., Mohadjer, S. & Richter, D. H. (2005). Digital Data for the Geology of Wrangell-Saint Elias National Park and Preserve, Alaska *U. S. Geological Survey* Open-File Report 2005-1342, http://pubs.usgs.gov/of/2005/1342/.

Wilson, F. H., Shew, N. & Dubois, G. D. (1994). Map and Table showing isotopic age data in Alaska. In: Plafker, G. & Berg, H. C. (eds.) *The Geology of Alaska*. Geological Society of America. The Geology of North America G-1, plate 8, 1 sheet, scale 1:2,500,000., pp.

Winkler, G. R. (2000). A Geologic Guide to Wrangell-Saint Elias National Park and Preserve, Alaska: A tectonic collage of northbound terranes. *U.S. Geological Survey.* Professional Paper 1616, 166 p.

Winkler, G. R. & MacKevett, E. M., Jr. (1981). Geologic map of the McCarthy C-7 Quadrangle, Alaska. *U. S. Geological Survey.* Map GQ-1533, scale 1:63,360.

Winkler, G. R., Silberman, M. L., Grantz, A., Miller, R. J. & MacKevett, E. M., Jr. (1981). Geologic map and summary geochronology of the Valdez Quadrangle, southern Alaska. *U. S. Geological Survey* Open-file Report. scale 1:250,000.

Woodsworth, G. J. (1988). Karmutsen Formation and the east boundary of Wrangellia, Queen Charlotte Basin, British Columbia. In: *Current research; Part E, Cordillera and Pacific margin*. Geological Survey of Canada. vol.88-1E, pp. 209-212.

Woodsworth, G. J. (ed.) (1991). *Evolution and Hydrocarbon Potential of the Queen Charlotte Basin, British Columbia*. Geological Survey of Canada, Paper 90-10.

Wyld, S. J. (1991). Permo-Triassic tectonism in volcanic arc sequences of the Western U.S. Cordillera and implications for the Sonoma orogeny. *Tectonics* **10**(5), 1007-1017.

Yole, R. W. (1963). Early Permian fauna from Vancouver Island, British Columbia. *Bulletin of Canadian Petroleum Geology* **11**, 138-149.

Yole, R. W. (1965). A faunal and stratigraphic study of Upper Paleozoic rocks of Vancouver Island, British Columbia. Ph.D., University of British Columbia, 254 pp.

Yole, R. W. (1969). Upper Paleozoic stratigraphy of Vancouver Island, British Columbia. *Proceedings of the Geological Association of Canada* **20**, 30-40.

Yole, R. W. & Irving, E. (1980). Displacement of Vancouver Island, paleomagnetic evidence from the Karmutsen Formation. *Canadian Journal of Earth Sciences* **17**, 1210-1228.

Yorath, C. J., Clowes, R. M., Green, A. G., Sutherland-Brown, A., Brandon, M. T., Massey, N. W. D., Spencer, C., Kanasewich, E. R. & Hyndman, R. D. (1985). Lithoprobe - Phase 1: Southern Vancouver Island: Preliminary analyses of reflection seismic profiles and surface geological studies. In: *Current Research, Part A*. Geological Survey of Canada, Paper 85-1A. pp. 543-554.

Yorath, C. J., Sutherland Brown, A. & Massey, N. W. D. (1999). LITHOPROBE, southern Vancouver Island, British Columbia. *Geological Survey of Canada.* LITHOPROBE, southern Vancouver Island, British Columbia Bulletin 498, 145 p.
